# Supplementary material for: Allelic variation and genetic diversity of HMW glutenin subunits in Chinese wheat (Triticum aestivum L.) landraces and commercial cultivars
Source: PubMed Central journal article supplement (PMC9522535; doi:10.1270/jsbbs.21076), 2022-02-02
Supplement: 72_169_s1.pdf [file 72_169_s1.pdf]

Supplemental Table 1. The list of collected 1523 wheat varieties.

| 597 landraces from HWWR and MLYWWR |                |                      |
|------------------------------------|----------------|----------------------|
| Sample ID                          | Common name    | allelic combinations |
| L1                                 | 11C194         | N/7+8/2+12           |
| L2                                 | pin II-4       | 2*/7+8/5+10          |
| L3                                 | pin 6-III      | 2*/7+8/5+10          |
| L4                                 | SN0052         | N/13+16/5+10         |
| L5                                 | 04 zhong 36    | 1/7+9/4+12           |
| L6                                 | pin11          | N/7+8/2+12           |
| L7                                 | zhe mai 1      | N/7+8/2+12           |
| L8                                 | bai huo mai    | N/7+8/2+12           |
| L9                                 | D5611          | 1/7+8/5+10           |
| L10                                | ge jia dou     | N/7+8/2+12           |
| L11                                | WA3D128        | 1/7+8/5+10           |
| L12                                | 15F7-4         | 1/7+9/2+10           |
| L13                                | J64-4          | 1/7+8/2+10           |
| L14                                | C-4            | N/7+9/2+10           |
| L15                                | da li ban zi   | N/7+8/2+10           |
| L16                                | gu lou ding    | 1/7+8/2+12           |
| L17                                | pin II-1       | N/7+8/2+12           |
| L18                                | bai tiao yu    | N/7+8/2+12           |
| L19                                | san yue huang  | N/7+8/2+12           |
| L20                                | pin 10         | N/7+8/5+12           |
| L21                                | pin bao        | N/7+8/2+12           |
| L22                                | bai bian sui   | N/7+8/2+12           |
| L23                                | WA2D27         | N/7+8/2+12           |
| L24                                | 07K1312        | N/7+8/2+12           |
| L25                                | WA5(125)       | N/7+8/2+12           |
| L26                                | 06 xuan        | 1/7+9/2+12           |
| L27                                | Pin 7          | 1/7+9/5+10           |
| L28                                | Huo Qiu        | N/7+8/2+10           |
| L29                                | Xin Shu Guang1 | N/7+9/2+10           |
| L30                                | En Mai 4       | N/7/2+12             |
| L31                                | Pin 6          | N/17+18/2+12         |
| L32                                | D1775-2        | N/13+16/5+10         |
| L33                                | Pin 5          | N/7+8/5+10           |
| L34                                | Guan 1         | 1/7+9/2+12           |
| L35                                | zi Yuan Mai    | N/7+8/2+12           |
| L36                                | Feng Chan 3    | N/7+8/2+12           |
| L37                                | 15F7-2         | N/7+9/5+12           |
| L38                                | J88-2          | N/6+8/2+12           |
| L39                                | Tu Mang Mai    | N/7+8/2+12           |
| L40                                | C1             | 1/7+9/5+10           |
| L41                                | Xing Yi 4      | N/7+9/2+12           |
| L42                                | Dong Nong101   | N/7+9/2+12           |
| L43                                | Nuo MaiD5659   | N/7+8/2+12           |

|     |                    |              |
|-----|--------------------|--------------|
| L44 | Shu Wan 8          | N/7+8/2+12   |
| L45 | Bai Hua Mai        | 1/7+8/2+12   |
| L46 | Ke Lao 4           | 1/7+9/2+12   |
| L47 | wen mai 6          | 1/7+9/5+10   |
| L48 | gamai              | N/7+8/2+12   |
| L49 | jing yang 60       | N/7+8/2+12   |
| L50 | Chong Bai Zi Mai   | 1/7+8/5+10   |
| L51 | Yi Zhi Mai         | N/7+8/2+12   |
| L52 | Da Yu Hua          | N/7/2+12     |
| L53 | Bai Nong 3217      | 1/7+8/2+12   |
| L54 | Xiao San Yue Huang | N/7+8/2+12   |
| L55 | Leng Tiao Hong Mai | N/7+8/2+12   |
| L56 | Shi Jia Zhuang407  | N/7/2+12     |
| L57 | Yang Mai 158       | N/7+8/2+12   |
| L58 | Feng Mai 11        | N/7+8/2+12   |
| L59 | Bu Jia Mai 7859    | N/7+9/2+12   |
| L60 | Gan Mai 8          | 1/7+8/2+12   |
| L61 | baipu              | N/7+8/2+12   |
| L62 | Bai Ma zhaD5703    | 1/7+8/2+12   |
| L63 | Ai Feng 3          | 1/7+9/2+12   |
| L64 | Zi Sui Hong        | 1/7+8/2+12   |
| L65 | Chun Mai D5697     | N/7+8/2+12   |
| L66 | Ma Li Ying 5       | N/7+8/2+12   |
| L67 | Xiao Chun 28       | N/7+8/2+10   |
| L68 | Zhu Shi Mai        | N/7+8/2+12   |
| L69 | Hui Ning 10        | 1/7+8/2+12   |
| L70 | Pao Zi Mai         | N/7+8/2+12   |
| L71 | Chi Ke             | N/7+8/2+12   |
| L72 | Bai Mang Mai       | N/7+8/2+12   |
| L73 | Song Rui Mai 4     | N/7+8/2+12   |
| L74 | Shui Yuan 86       | N/7+9/2+12   |
| L75 | Cang Dong 4        | N/7+8/2+12   |
| L76 | Shan Mai           | N/7+8/2+12   |
| L77 | KaBKa3             | 1/7+8/5+10   |
| L78 | Cai Zhou 953       | N/7+9/2+12   |
| L79 | Gao Yuan 506       | N/7+9/2+12   |
| L80 | Xiao Yan 506       | 1/7+8/5+10   |
| L81 | D5755              | N/7+8/2+12   |
| L82 | Da Kou Mai         | N/7+8/2+12   |
| L83 | Shang Lin Xiao Mai | N/7+8/2+12   |
| L84 | Shi Mu-14          | N/7+8/2+12   |
| L85 | dian xi hong ke    | 1/13+16/2+12 |
| L86 | Da Bai Mai         | N/7+8/5+10   |
| L87 | D5698              | N/7+8/2+12   |
| L88 | Guang Feng 3       | N/7+8/2+12   |
| L89 | Xian Nong 39       | 1/7+8/5+10   |
| L90 | Bai Mang Mai       | 1/7+8/2+12   |

|      |                       |             |
|------|-----------------------|-------------|
| L91  | Jin Huang Mai         | N/7+8/2+12  |
| L92  | Mu Jia Dan Ga         | N/22/2+12   |
| L93  | Qing Chun 28          | N/7+8/2+12  |
| L94  | Yan Mai 15            | 1/7+9/2+12  |
| L95  | Bai Da Tou            | N/7+8/2+12  |
| L96  | Fu Mai                | 1/7+8/2+12  |
| L97  | Bai Mang Xiao Mai     | N/7+9/2+12  |
| L98  | Xin Ke Han 9          | 1/7+9/2+12  |
| L99  | Qiang Chang Mai       | N/7+22/2+12 |
| L100 | Ping Yin-27           | N/7+8/2+12  |
| L101 | Tong Jia Ba Xiao Mai  | N/7+8/2+12  |
| L102 | Yu qiu Mai            | N/7+8/2+12  |
| L103 | Huang Hua Mai         | N/7+8/2+12  |
| L104 | D5727 Gan Mai 8       | 1/7+8/2+12  |
| L105 | Ji Chun 1016          | 2*/7+9/5+10 |
| L106 | Loorin-10             | 2*/7+8/2+12 |
| L107 | Jin Mai 2148          | N/7+8/2+12  |
| L108 | Da Qing Mang          | N/7+8/2+12  |
| L109 | Hong Mang Mai         | N/7+8/2+12  |
| L110 | Kang Ding Xiao Mai    | N/7+8/2+12  |
| L111 | Tanori                | 1/7+8/5+10  |
| L112 | Ao De Sa 3            | N/6+8/2+12  |
| L113 | Qian Jiao Mai         | 2*/7+9/2+12 |
| L114 | orofer Ou Guo         | N/7+8/2+12  |
| L115 | Funo A Fu             | N/7+8/2+12  |
| L116 | Fan 6                 | N/7+8/2+12  |
| L117 | Ri Ka Ze-8            | 1/7+8/2+12  |
| L118 | Bi Ma 1               | N/7+8/2+12  |
| L119 | Hong Xu Mai           | N/7+8/2+12  |
| L120 | Hong Hua Mai          | N/7+8/2+12  |
| L121 | Bian Ba Chun Mai-6    | N/7+8/2+12  |
| L122 | D5683                 | N/7+8/2+12  |
| L123 | Jiang Chun Mai        | N/7+8/2+12  |
| L124 | Zheng Zhou 6          | 1/7+8/2+12  |
| L125 | Fu Zhuang 30          | 1/7+8/2+12  |
| L126 | ningchub4             | 1/7+8/2+12  |
| L127 | Hong Hua Zi           | 1/7+8/2+12  |
| L128 | He Shang Mai D655     | N/7+8/2+12  |
| L129 | Zi Pi                 | N/7+8/2+12  |
| L130 | You Mang Sao Gu Xing  | N/7+8/2+12  |
| L131 | Cheng Du Guang Tou    | N/7+8/2+12  |
| L132 | Jin Mai2148           | N/7+8/2+12  |
| L133 | Han Zhong Bai         | N/7+8/2+12  |
| L134 | Zhu Gou Mai           | N/7+8/2+12  |
| L135 | D5695                 | N/7+8/2+12  |
| L136 | Bian Guang Tou Ke Mai | 2*/7+9/5+10 |
| L137 | Di Xiu Han            | N/7+8/2+12  |

|      |                         |              |
|------|-------------------------|--------------|
| L138 | Wu Mang Chun Mai        | N/7+8/5+10   |
| L139 | Gui Nong 10             | N/7+9/2+12   |
| L140 | Ban Jie Mang            | N/7*+8/2+10  |
| L141 | Bai Dong Mai            | N/7+8/2+12   |
| L142 | Huo Han Yan             | N/7+8/2+12   |
| L143 | Gao Yuan 506            | N/7+9/2+12   |
| L144 | Hong Tu Zi              | N/7+8/2+10   |
| L145 | Shi Jia Zhuang 54       | N/7+8/2+12   |
| L146 | Han Yang Mai            | N/7+8/2+12   |
| L147 | Zha Hong                | N/7+8/2+12   |
| L148 | Jiang Mai               | 1/7+8/5+10   |
| L149 | Hu Bu Hong              | N/6+8/5+10   |
| L150 | San Yue Huang           | 1/7+8/2+12   |
| L151 | Xiao Yan 6              | 1/13+16/5+10 |
| L152 | Ji Nan 2                | N/7+8/2+12   |
| L153 | Yang Mai                | N/7+8/2+12   |
| L154 | Ben Di Huang Hua Mai    | N/7+9/2+12   |
| L155 | Nei Xiang               | N/7+8/2+12   |
| L156 | Hong He Shang Tou       | N/7+8/2+12   |
| L157 | Fu Mai                  | N/7+8/5+10   |
| L158 | C An Xiao Mai           | N/7+8/2+12   |
| L159 | Chang Mang Shi Bian Tou | N/7+8/2+12   |
| L160 | Yun Mai 34              | N/7+9/2+12   |
| L161 | Huo Mai                 | N/7+8/2+12   |
| L162 | Bai Mang Mai            | N/7+8/2+12   |
| L163 | Shen Gen                | 1/7+8/2+12   |
| L164 | Bi Mai 26               | N/7+8/5+10   |
| L165 | Fu Yang Mai             | N/7+8/4+12   |
| L166 | Xin Shu Guang 6         | 1/7+8/5+10   |
| L167 | D5696                   | 2*/7+8/5+10  |
| L168 | Mang Xiao Mai           | N/7+8/2+12   |
| L169 | Dun Hua Chun Mai        | N/7+8/2+12   |
| L170 | Bi Ma 4                 | N/7+8/4+12   |
| L171 | Jin Mai 4               | 1/7+8/2+12   |
| L172 | Yang Mai                | 1/7/4+12     |
| L173 | Mo Tuo Xiao Mai         | N/7+8/2+12   |
| L174 | Yang Mai                | N/7+8/2+12   |
| L175 | Hong Gou Dou            | N/7+8/2+12   |
| L176 | Tai Shan -1             | N/7+8/5+10   |
| L177 | Hua Dong 6              | 2*/7+9/5+10  |
| L178 | Sheng He Xiao Mai       | N/7+8/2+12   |
| L179 | Che Zi                  | N/7+8/2+12   |
| L180 | Zheng Yin 4             | 1/13+19/2+12 |
| L181 | WA6E142                 | N/7+9/5+10   |
| L182 | You 1083                | N/7+9/2+12   |
| L183 | Ping Yuan 50            | N/7+8/2+12   |
| L184 | Zheng Zhou 741          | 1/7/5+10     |

|      |                          |              |
|------|--------------------------|--------------|
| L185 | Xi Nong 07K1310          | N/7+9/2+12   |
| L186 | Bai You Mai              | N/7+9/2+12   |
| L187 | Bai Tu Zi Tou            | 1/7+8/4+12   |
| L188 | Lao Qi Mai               | 1/7+8/2+12   |
| L189 | Chu Shan Bao             | N/7+8/2+12   |
| L190 | pin II-2                 | N/7+8/2+12   |
| L191 | WA9D4                    | N/7/2+12     |
| L192 | Pin 9                    | N/7/2+10     |
| L193 | WA8E81                   | 1/7+9/2+12   |
| L194 | Lan Xi Zao Xiao Mai      | N/7+8/2+12   |
| L195 | you Bao                  | 1/7+9/5+12   |
| L196 | Pin 3                    | 2*/7+8/5+10  |
| L197 | Xi Shan Bian Sui         | N/7+8/2+10   |
| L198 | San Ke Cun               | N/13+16/2+12 |
| L199 | Xiao Fo Shou             | N/7+8/2+12   |
| L200 | Xin 27                   | N/7+8/2+12   |
| L201 | Hua 1223                 | 1/7+8/2+12   |
| L202 | PJ-2                     | N/7+8/2+12   |
| L203 | WA40167                  | 1/7+9/5+10   |
| L204 | DH16                     | N/7+8/2+12   |
| L205 | Fan-2                    | 1/7+8/5+10   |
| L206 | Da Bai Mai               | N/13+16/2+10 |
| L207 | Wu Jiang Cao             | N/7+16/2+10  |
| L208 | San Yue Huang            | N/7+8/2+12   |
| L209 | Chong Yang Hong Mai      | N/7+8/2+12   |
| L210 | Da Tou Chun              | N/7+8/2+12   |
| L211 | Hong Mai                 | N/7+8/2+12   |
| L212 | Zhu Ye Qing              | N/7+8/2+12   |
| L213 | Zi Mai                   | N/7+8/2+12   |
| L214 | Yang Xin Da Tou          | N/7+8/2+12   |
| L215 | Zhu You Bai              | N/7+8/2+12   |
| L216 | Xun Xi Er Chi Ban        | 1/7+8/2+12   |
| L217 | Xun Xi Hong Ke Mai       | N/7+8/2+12   |
| L218 | Cao Xie Ban              | N/7+8/2+12   |
| L219 | Cao Xie Ban              | N/7+8/2+12   |
| L220 | Li Chuan San Yue Huang-3 | N/7+8/2+12   |
| L221 | Yi Xi Shi                | 1/7+8/2+12   |
| L222 | Yi Li Piao               | N/7+8/2+12   |
| L223 | Pu Shan Ba Xiao Mai      | N/17+18/2+12 |
| L224 | Ba Di Tuo                | N/7+9/2+12   |
| L225 | Ba Lian Tuo              | N/14+15/2+12 |
| L226 | Ba Gu Tao                | N/7+8/2+12   |
| L227 | Ba Gu Tao-2              | N/7+8/2+12   |
| L228 | San Yue Huang            | N/7+8/2+12   |
| L229 | San Yue Huang            | N/7+9/2+12   |
| L230 | San Yue Huang            | 1/6+8/5+10   |
| L231 | San Yue Huang            | N/7+8/2+12   |

|      |                     |                |
|------|---------------------|----------------|
| L232 | San Yue Huang       | $N/7+8/2+12$   |
| L233 | San Yue Huang       | $N/7+8/2+12$   |
| L234 | San Yue Huang       | $N/7+8/2+12$   |
| L235 | San Yue Huang       | $1/6+8/5+10$   |
| L236 | San Yue Huang       | $N/7+8/2+12$   |
| L237 | San Yue Huang 1     | $N/7*+8/2+12$  |
| L238 | San Yue Huang 2     | $N/7+8/2+12$   |
| L239 | San Yue Liu Zao Mai | $1/7+8/5+10$   |
| L240 | San Yue Liu Zao Mai | $1/7+8/2+12$   |
| L241 | San Li Yi Cun       | $N/17+18/N$    |
| L242 | San Ke Cun          | $N/7/2+12$     |
| L243 | Da Bai Mang         | $N/7+8/2+12$   |
| L244 | Da Tou Mai          | $1/7+8/2+12$   |
| L245 | Da Tou Chun         | $N/7+8/5+10$   |
| L246 | Da Tou Huang        | $N/6+8/5+10$   |
| L247 | Da Tou Huang        | $N/7+8/2+12$   |
| L248 | Da Hong Mang        | $N/7+8/2+12$   |
| L249 | Da Hong Mang Mai    | $N/7+8/2+12$   |
| L250 | Da Pi Gu Xiao Mai   | $1/7+8/2+12$   |
| L251 | Da Sui Mai          | $1/7+8/2+12$   |
| L252 | Xiao Duo Bai        | $N/7+8/2+12$   |
| L253 | Xiao Hong Mang Mai  | $N/7+8/5+10$   |
| L254 | Xiao He Shang Tou   | $N/7+8/2+12$   |
| L255 | Xiao He Shang Tou   | $N/7+8/2+12$   |
| L256 | Xiao Yang Mai       | $N/7+8/2+12$   |
| L257 | Shan Lin Guo Mai    | $2*/7+9/2+12$  |
| L258 | Shan Xi Zao         | $N/7+8/2+12$   |
| L259 | Qian Jin Bu Dao     | $N/7+8/2+12$   |
| L260 | Qian Jin Bu Dao     | $N/7+8/2+12$   |
| L261 | Qian Jin Bu Dao     | $1/7+8/2+12$   |
| L262 | Qian Jin Bu Dao Fu  | $N/7+8/2+12$   |
| L263 | Qian Jin Ding       | $1/7+9/2+12$   |
| L264 | Zi Mai              | $N/7+8/2+12$   |
| L265 | Yun Nan Zao         | $N/7*+8/2+12$  |
| L266 | Wu Yue Zao          | $N/7+8/2+12$   |
| L267 | Wu Hong Cao         | $N/7+8/2+12$   |
| L268 | Wu Hong Cao         | $N/7+8/2+12$   |
| L269 | Wu Hong Cao         | $1/7+8/2+12$   |
| L270 | Wu Hong Cao         | $N/7+8/2+12$   |
| L271 | Shui Bian Zhi       | $N/7+8/2+12$   |
| L272 | Mao Gan             | $1/7/5+10$     |
| L273 | Chang Sha Mai       | $N/7+8/2+12$   |
| L274 | Chang Xu Mai        | $N/7+8/2+12$   |
| L275 | Jin Da Dan          | $N/7+8/2+12$   |
| L276 | Liu Yue Huang       | $N/14+15/2+12$ |
| L277 | Liu Jin Mu          | $N/7+8/2+12$   |
| L278 | Huo Xu Mai          | $1/7+8/2+12$   |

|      |                        |              |
|------|------------------------|--------------|
| L279 | Huo S Tou              | N/7+8/2+12   |
| L280 | Huo S Tou              | N/7+8/2+12   |
| L281 | Huo Yan Mai            | N/7+8/2+12   |
| L282 | Huo Liao Tou           | N/7+8/2+12   |
| L283 | Huo Liao Yan           | N/7+8/2+12   |
| L284 | Huo Wu Tou             | 1/7+8/2+12   |
| L285 | Huo Mai                | N/7+9/2+12   |
| L286 | Huo Mai                | N/7*+8/2+12  |
| L287 | Huo Mai                | N/7+8/2+12   |
| L288 | Huo Mai                | N/7+8/2+12   |
| L289 | Jin Da Dan             | N/7+22/N     |
| L290 | Jin Da Dan             | 1/7+22/2+12  |
| L291 | Wu Jin Xiao Mai        | N/7+8/2+12   |
| L292 | Yu Mai                 | N/7+22/N     |
| L293 | Yu Mai                 | N/7+9/2+12   |
| L294 | Yu Mai                 | 1/7+9/2+12   |
| L295 | Bian Zhong Xiao Mai    | 1/7+8/2+12   |
| L296 | Ben Di Xiao Mai        | N/13+16/2+12 |
| L297 | Ben Di Xiao Mai        | 1/7+8/2+12   |
| L298 | Shi Xia Yang Mai       | N/7+8/2+12   |
| L299 | Shi Hui Tiao           | N/7+9/2+12   |
| L300 | Si Fang Luo Xiao Mai   | N/7+9/2+12   |
| L301 | Bai Xiao Mai           | 1/7+9/2+12   |
| L302 | Bai Ma Ya Xiao Mai     | 1/13+16/2+12 |
| L303 | Bai Huo Deng Tou       | N/7+8/2+12   |
| L304 | Bai Yu Pi              | 1/7+8/2+12   |
| L305 | Bai Yu Mai             | 1/7+8/2+12   |
| L306 | Bai Pi Mai             | N/7+8/2+12   |
| L307 | Bai Mang Da Zi         | N/7+8/2+12   |
| L308 | Bai Mang Xiao Mai      | N/7+9/2+12   |
| L309 | Bai Mang Guang Tou Mai | N/7+8/2+12   |
| L310 | Bai Mang Guang Tou Mai | N/7+8/2+12   |
| L311 | Bai Mang Mai           | N/7+8/2+12   |
| L312 | Bai Mang Mai           | 1/7+8/2+12   |
| L313 | Bai Mang Mai           | N/14+15/2+12 |
| L314 | Bai Guang Tou 1        | 1/7+8/2+12   |
| L315 | Bai Guang Tou 2        | N/7+8/2+12   |
| L316 | Bai Guang Tou Mai      | 1/7+8/2+12   |
| L317 | Bai Mai                | 1/7/2+12     |
| L318 | Bai Mai                | N/7+8/2+12   |
| L319 | Bai Mai                | N/7+22/2+12  |
| L320 | Bai Mai                | 1/7+9/2+12   |
| L321 | Bai Mai Zi             | N/7*+8/2+12  |
| L322 | Bai Mai Zi             | N/7+8/2+12   |
| L323 | Bai Mai Zi             | N/7+8/2+12   |
| L324 | Bai Ke Jiang           | N/7+8/2+12   |
| L325 | Bai He Shang Tou       | N/7+8/2+12   |

|      |                        |              |
|------|------------------------|--------------|
| L326 | Bai He Shang Tou       | N/7+8/2+12   |
| L327 | Bai Ge Ta              | N/7+8/2+12   |
| L328 | Bai Xu                 | N/7+22/2+12  |
| L329 | Bai Yang La Zi         | N/7+8/2+12   |
| L330 | Bai Quan Mang          | N/7*+8/2+12  |
| L331 | Bai Quan Mang          | 2*/7*+8/2+12 |
| L332 | Bai Juan Mang          | N/7+8/2+12   |
| L333 | Cong Qing Mai          | N/7+8/2+12   |
| L334 | Cong Qiu Mai           | N/7+8/2+12   |
| L335 | Ling Xuan 5            | 1/7+9/2+12   |
| L336 | Dong Mai               | N/7+8/2+12   |
| L337 | Ban Yue Zao            | N/7+8/2+12   |
| L338 | Tai Xiao Mai           | 1/7+8/2+12   |
| L339 | Ni Qiu Chuan           | N/7+8/2+12   |
| L340 | Lai Feng Hong Ke Jiang | N/7+8/2+12   |
| L341 | Lao Mang Mai           | N/7+8/2+12   |
| L342 | Lao Hong Xu Mai        | N/7+9/2+12   |
| L343 | Lao Tie Gan Cao        | N/7+8/2+12   |
| L344 | Lao Tie Gan Cao        | N/14+15/2+12 |
| L345 | Mang Zi Mai            | N/7+8/2+12   |
| L346 | Xi Yang Zao            | N/7+8/2+12   |
| L347 | Zao Feng Shou          | 1/7+8/2+12   |
| L348 | Guang Tou Xiao Mai     | N/20/2+12    |
| L349 | Guang Tou Bai Mai Zi   | 1/7+8/2+12   |
| L350 | Guang Guang Tou        | N/7+8/2+12   |
| L351 | Guang Tu Mai           | 1/7+8/2+12   |
| L352 | Tuan Yu Dan            | N/7+8/2+12   |
| L353 | Zhu Ye Qing            | N/7+8/2+12   |
| L354 | Zhu Gan Qing           | N/7+8/2+12   |
| L355 | Zhu Gan Qing           | N/7+8/2+12   |
| L356 | Zi Jing Bai            | N/7+8/2+12   |
| L357 | Qi Tou Huang           | N/7+8/2+12   |
| L358 | Qi Tou Huang           | N/7+8/2+12   |
| L359 | Guan Yu Hong           | N/7+8/2+12   |
| L360 | Hong San Ai            | N/7+9/2+12   |
| L361 | Hong Xiao Mai          | N/7+8/2+12   |
| L362 | Hong Mao Qiu           | 1/7+8/2+12   |
| L363 | Hong Mang              | 1/7+8/2+12   |
| L364 | Hong Mang              | N/13+16/2+12 |
| L365 | Hong Mang              | N/7+8/2+12   |
| L366 | Hong Mang Zi           | N/7+9/2+12   |
| L367 | Hong Mang Mai          | 1/7+8/2+12   |
| L368 | Hong Mai               | N/7+8/2+12   |
| L369 | Hong Ke Chong          | 2*/7+8/2+12  |
| L370 | Hong Ke Mai            | N/7+9/2+12   |
| L371 | Hong Ke Mai            | N/7+8/2+12   |
| L372 | Hong Hua Zao           | N/7+8/2+12   |



|      |                      |               |
|------|----------------------|---------------|
| L373 | Hong He Shang Tou    | N/7+8/5+10    |
| L374 | Hong He Shang Tou    | 2*/7+8/5+10   |
| L375 | Hong He Shang Tou    | N/7+8/2+12    |
| L376 | Hong He Shang Tou    | N/7+8/2+12    |
| L377 | Hong He Shang Tou    | N/7+8/2+12    |
| L378 | Hong Xu              | N/7+8/2+12    |
| L379 | Hong Xu Mai          | 2*/7+8/2+12   |
| L380 | Hong Xu Mai          | N/7+8/2+12    |
| L381 | Hong Quan Mang       | N/7+8/2+12    |
| L382 | Hong Quan Mang       | N/7+8/2+12    |
| L383 | Hong Quan Mang       | N/7+8/2+12    |
| L384 | Hong Tao Mai         | N/7+8/2+12    |
| L385 | Hong Tao Mai         | 2*/7+8/2+12   |
| L386 | Hong Mang            | N/7+8/2+12    |
| L387 | Guan Yin Lian        | N/7+8/2+12    |
| L388 | Mai Er Dong Xiao Mai | N/7+8/4+12    |
| L389 | Xiao Gan Mai         | 1/20/2+12     |
| L390 | Dou Mai              | 1/20/2+12     |
| L391 | Ying Shan Da Gu Chui | N/7+8/2+12    |
| L392 | Leng Sha Cao         | N/7+8/2+12    |
| L393 | Qing Yi              | N/13+16/2+12  |
| L394 | Feng Shu Qiu         | 2*/7+8/2+12   |
| L395 | Feng Ye Qiu          | 2*/7+8/2+12   |
| L396 | Yu Lin Zi 1          | N/7+8/2+12    |
| L397 | Yu Lin Zi 2          | N/7+8/2+12    |
| L398 | Yu Lin Zi 3          | 2*/7+8/2+12   |
| L399 | He Shang Tou         | N/7+8/2+12    |
| L400 | He Shang Tou         | N/14+15/2+12  |
| L401 | He Shang Tou         | 2*/7+8/2+12   |
| L402 | He Shang Tou         | N/7+8/2+12    |
| L403 | He Shang Tou         | 1/7+9/2+12    |
| L404 | He Shang Tou         | 2*/7+8/2+12   |
| L405 | He Shang Tou 1       | 1/7+9/2+12    |
| L406 | He Shang Tou 2       | N/20/2+12     |
| L407 | He Shang Mai         | N/7+8/2+12    |
| L408 | He Shang Mai         | N/17+18/2+12  |
| L409 | He Shang Mai         | N/14+15/2+12  |
| L410 | Jin Da               | N/7+8/2+12    |
| L411 | Jin Guang Mai        | 2*/7+8/2+12   |
| L412 | Yu Lin Bai           | N/7+8/2+12    |
| L413 | Mei Yu Mai           | 2*/13+16/5+10 |
| L414 | Mei Guo Yu           | N/7+8/2+12    |
| L415 | He Nan Cao           | N/7+8/2+12    |
| L416 | He Nan Cao           | 2*/7*+8/2+12  |
| L417 | Pao Mai              | N/7+9/2+12    |
| L418 | Ni Mai               | N/20/2+12     |
| L419 | Yi Du Xiao Mai       | 2*/7+8/2+12   |

|      |                       |              |
|------|-----------------------|--------------|
| L420 | Shi Gan               | N/7+9/5+10   |
| L421 | Nan Jing Mei          | N/7/2+12     |
| L422 | Nan Sang Zi           | N/14+15/2+12 |
| L423 | Cao Xie Bian          | N/7+9/5+10   |
| L424 | Cao Xie Bian Xiao Mai | 2*/7+8/2+12  |
| L425 | Cao Xie Ban           | N/7+8/2+12   |
| L426 | Cao Xie Ban           | 2*/7+8/2+12  |
| L427 | Huang Zi Mai          | N/7+8/2+12   |
| L428 | Dian Tou Mai          | N/7+8/2+12   |
| L429 | Pei Shan Mai          | N/7*+8/2+12  |
| L430 | Sheng Li Hong         | N/7+8/2+12   |
| L431 | Z Mai                 | N/7+8/2+12   |
| L432 | Ma Yi Dan             | 2*/7+8/2+12  |
| L433 | Xun Xi Dao Qi         | N/7*+8/2+12  |
| L434 | Ha Dan San            | N/7+8/2+12   |
| L435 | Bai Mao               | N/7+8/2+12   |
| L436 | Zhong Qing Mai        | N/7+8/2+12   |
| L437 | Liu Mang Mai          | N/7+8/2+12   |
| L438 | Zi Mai                | N/7+8/2+12   |
| L439 | Zi Mai                | N/7+8/2+12   |
| L440 | Yang Mai              | N/7+8/2+12   |
| L441 | Yang Mai              | 2*/7+8/2+12  |
| L442 | Yang La Zi Xiao Mai   | N/7+8/2+12   |
| L443 | San Dan               | N/7+8/2+12   |
| L444 | Dun Ban               | N/20/2+12    |
| L445 | Yuan Du Mai           | N/7+8/2+12   |
| L446 | Yuan Zhui             | 2*/7+8/2+12  |
| L447 | Can Dou Mai           | N/7*+8/2+12  |
| L448 | Tie Zi Mai            | N/7+8/2+12   |
| L449 | Tie Gan Ai            | 1/6+8/2+12   |
| L450 | Tie Gan Cao           | 1/7+8/2+12   |
| L451 | Tie Gan Cao           | N/7+8/2+12   |
| L452 | Tie Gan Cao           | N/7+8/2+12   |
| L453 | Tie Gan Cao 1         | N/7+8/2+12   |
| L454 | Tie Gan Cao 2         | N/7+8/2+12   |
| L455 | Tie Zi Mai            | N/13+16/2+12 |
| L456 | Tie Zi Mai            | N/7+8/2+12   |
| L457 | Gao Shan Xiao Mai     | N/7+8/2+12   |
| L458 | Quan Mang             | N/7+8/2+12   |
| L459 | Quan Mang             | N/7+8/2+12   |
| L460 | Quan Mang             | N/7+8/2+12   |
| L461 | Quan Mang Xiao Mai    | N/7+8/2+12   |
| L462 | Quan Mang Mai         | N/14+15/2+12 |
| L463 | Shui Ba Gu Tao        | N/7+8/2+12   |
| L464 | Shan Zi Mai           | N/7+8/2+12   |
| L465 | Qiu Mai               | N/7*+8/2+12  |
| L466 | Huang Shu Lang Pi     | N/7+8/2+12   |

|      |                       |              |
|------|-----------------------|--------------|
| L467 | Cai Zi Huang Xiao Mai | N/7+8/2+12   |
| L468 | Zi Tou                | N/7+8/2+12   |
| L469 | E Yu Zao              | N/7+8/2+12   |
| L470 | Chong Yang Xiao Mai 1 | N/7+8/2+12   |
| L471 | Chong Yang Xiao Mai 2 | N/20/2+12    |
| L472 | Chong Yang Hong Mai 1 | N/7+8/2+12   |
| L473 | Chong Yang Hong Mai 2 | N/7+8/2+12   |
| L474 | Li Dao Mai            | N/7+8/2+12   |
| L475 | Zi Mai                | N/7+8/2+12   |
| L476 | Zi Mai                | N/7+8/2+12   |
| L477 | Qin Ke Mai            | N/7+9/2+12   |
| L478 | Xi Ma Zi Mai          | N/7+9/2+12   |
| L479 | Wo Jiao Mai           | N/13+16/2+12 |
| L480 | Pu Shan Ba            | N/7+8/2+12   |
| L481 | Pu Shan Ba            | N/7+8/2+12   |
| L482 | Pu Shan Ba            | N/7+8/2+12   |
| L483 | wu gong Chong 1       | N/7+8/2+12   |
| L484 | wu gong Chong 2       | N/14+15/2+12 |
| L485 | wu gong mai           | N/7+8/2+12   |
| L486 | wu gong mai           | N/7+8/2+12   |
| L487 | wu gong mai           | N/7+8/2+12   |
| L488 | wu gong mai           | N/7+8/2+12   |
| L489 | wu gong mai 3         | 2*/7+8/2+12  |
| L490 | wu gong Xu            | N/7*+8/2+12  |
| L491 | wu gong Xu            | N/7+8/2+12   |
| L492 | wu gong Cao           | N/7*+8/2+12  |
| L493 | wu gong Cao           | N/7+8/2+12   |
| L494 | wu gong Cao           | N/7+8/2+12   |
| L495 | Chui Zi Ba            | N/7+8/2+12   |
| L496 | Ai Jiao Huang         | N/7+8/2+12   |
| L497 | Huai Shu Qiu          | N/7+8/2+12   |
| L498 | Duan Yang Zao         | N/7+8/2+12   |
| L499 | Luo Zi Mai            | N/7+8/2+12   |
| L500 | Luo Si Mai            | N/7+8/2+12   |
| L501 | Luo Si Mai            | N/7+8/2+12   |
| L502 | Heng Zi Mai           | N/7+8/2+12   |
| L503 | Kao Shan Hong         | N/7+8/2+12   |
| L504 | ji Yu Bao             | N/7+8/2+12   |
| L505 | ji Yu Bao             | N/7+8/2+12   |
| L506 | ji Yu Bao             | N/7+8/2+12   |
| L507 | ji Yu Bao             | N/7+8/2+12   |
| L508 | ji Yu Zi              | N/7+8/2+12   |
| L509 | ji Yu Po              | N/7+8/2+12   |
| L510 | ji Yu Bao             | 2*/7+8/2+12  |
| L511 | Bao Di Jia            | N/7+8/2+12   |
| L512 | Bao Di Jiang          | N/7+8/2+12   |
| L513 | Bao Di jiang          | N/7+8/2+12   |

|      |                       |                |
|------|-----------------------|----------------|
| L514 | Yi Gen Dan            | $N/7*8/2+12$   |
| L515 | Yi Ke Miao            | $N/7+8/2+12$   |
| L516 | San Yue Huang         | $N/7+9/2+12$   |
| L517 | San Yue Huang         | $N/7+8/2+12$   |
| L518 | San Yue Huang         | $N/7+8/2+12$   |
| L519 | San Yue Huang         | $N/7+8/2+12$   |
| L520 | San Yue Huang         | $N/7+8/2+12$   |
| L521 | San Yue Huang         | $N/7+8/2+12$   |
| L522 | San Yue Huang         | $N/7+8/2+12$   |
| L523 | San Li Cun            | $N/13+16/2+12$ |
| L524 | San Ke Cun            | $N/13+16/2+12$ |
| L525 | San Ke Cun            | $N/13+16/2+12$ |
| L526 | Da Hong Mang          | $N/7+8/2+12$   |
| L527 | Da Mai Zi             | $N/7+8/2+12$   |
| L528 | Da He Shang Tou       | $N/7+9/2+12$   |
| L529 | Xiao Xiao Mai         | $N/7+8/2+12$   |
| L530 | Xiao Mai              | $N/7+8/2+12$   |
| L531 | Xiao Mai              | $N/7+8/2+12$   |
| L532 | Xiao Tie Zi Mai       | $N/13+16/2+12$ |
| L533 | Liu Leng Zi           | $N/7+8/2+12$   |
| L534 | Ben Di Mai            | $N/7+8/2+12$   |
| L535 | Bai Xiao Mai          | $N/7+8/2+12$   |
| L536 | Bai Xiao Mai          | $N/7+8/2+12$   |
| L537 | Bai Xiao Mai          | $N/7+8/2+12$   |
| L538 | Bai Mai               | $1/7+9/2+12$   |
| L539 | Bai Mai               | $N/7+9/2+12$   |
| L540 | Bai Mai Zi            | $N/13+16/2+12$ |
| L541 | Bai Mai Zi            | $N/7+8/2+12$   |
| L542 | Bai Mai Zi            | $N/7+8/2+12$   |
| L543 | Bai Ke Jiang          | $N/7+8/2+12$   |
| L544 | Bai He Shang Tou      | $N/7+8/2+12$   |
| L545 | Lao Xiao Mai          | $N/7+8/2+12$   |
| L546 | Lao Mai Zi            | $N/7+22/2+12$  |
| L547 | Guang Tou Mai         | $N/7+8/2+12$   |
| L548 | Quan Mang Zi          | $N/7+8/2+12$   |
| L549 | Quan Mang Zi          | $N/7+8/2+12$   |
| L550 | Hong Xiao Mai         | $N/7+8/2+12$   |
| L551 | Hong Pi Mai           | $N/7+8/2+12$   |
| L552 | Hong Mang Zi          | $N/7+8/2+12$   |
| L553 | Hong Mang Zi          | $2*/7+8/2+12$  |
| L554 | Hong Mang Mai         | $N/7+8/2+12$   |
| L555 | Hong Mang Mai         | $N/7+8/2+12$   |
| L556 | Hong Mang Mai         | $N/7+8/2+12$   |
| L557 | Hong Mang Mai         | $N/7+8/2+12$   |
| L558 | Hong Mang Mai         | $N/7+8/2+12$   |
| L559 | Hong Mang Mai         | $N/7*8/2+12$   |
| L560 | Hong Mang Li Jian Mai | $N/7+8/2+12$   |

|                                           |                   |              |
|-------------------------------------------|-------------------|--------------|
| L561                                      | Hong Mai          | N/7+8/2+12   |
| L562                                      | Hong Mai          | N/7+8/2+12   |
| L563                                      | Hong Mai          | N/7+8/2+12   |
| L564                                      | Hong Hua Xiao Mai | N/7+8/2+12   |
| L565                                      | Hong Xu Mai       | N/7+8/2+12   |
| L566                                      | Su Ke Xi          | N/7*+8/2+12  |
| L567                                      | He Shang Tou      | N/7+8/5+10   |
| L568                                      | He Shang Tou      | 1/7+8/2+12   |
| L569                                      | He Shang Tou      | 2*/7+8/2+12  |
| L570                                      | Shan Xi Xiao Mai  | 2*/7+8/2+12  |
| L571                                      | Shan Xi Zao       | N/7+8/2+12   |
| L572                                      | S Mai             | N/13+16/2+12 |
| L573                                      | Cao Zi Huang      | N/7+9/2+12   |
| L574                                      | Cao Xie Ban       | N/7+8/2+12   |
| L575                                      | Cao Xie Ban       | N/7+9/2+12   |
| L576                                      | Nan Da Bai Mai    | 2*/7+8/2+12  |
| L577                                      | Nan Da Mai        | N/7+8/2+12   |
| L578                                      | Nan Xiao Mai      | N/7+8/2+12   |
| L579                                      | Nan Shan Xiao Mai | 2*/7+8/2+12  |
| L580                                      | Nan Jing Zao      | N/7+8/2+12   |
| L581                                      | Nan Jing Zi       | N/20/2+12    |
| L582                                      | Nan Jing Zi       | N/7+8/2+12   |
| L583                                      | Ha Zi Wu Mai      | N/7+9/2+12   |
| L584                                      | Yang Xiao Mai     | N/7+8/2+12   |
| L585                                      | Tie Gan Cao       | N/7+8/2+12   |
| L586                                      | Tie Gan Cao       | N/7+8/2+12   |
| L587                                      | Tie Gan Cao       | N/7+8/2+12   |
| L588                                      | Gao Gan Xiao Mai  | 1/7+8/2+12   |
| L589                                      | Quan Wang Mai     | N/7+8/2+12   |
| L590                                      | Pai Deng Mai      | N/7+8/2+12   |
| L591                                      | Ben Mai           | N/7+8/2+12   |
| L592                                      | Duan Gan Bai      | N/7+8/2+12   |
| L593                                      | Duan Gan Duo      | 1/7+9/2+12   |
| L594                                      | Ai Gan Hong       | 2*/7+9/2+12  |
| L595                                      | Ai Gan Hong       | N/7+8/2+12   |
| L596                                      | Ke Li Bai         | N/7+8/2+12   |
| L597                                      | Ke Li Jian        | N/7+8/2+12   |
| <b>926 commercial varieties</b>           |                   |              |
| <b>504 commercial varieties from HWWR</b> |                   |              |
| C1                                        | Han 5316          | 1/7+8/2+12   |
| C2                                        | Han 6172          | 1/14+15/2+12 |
| C3                                        | Han Mai 17        | N/7+8/5+10   |
| C4                                        | Han Mai 18        | 1/13+16/5+12 |
| C5                                        | Hua 521           | N/7+9/2+12   |
| C6                                        | Ji 5385           | 1/7+8/5+10   |
| C7                                        | Ji Mai 15         | 2*/7+9/2+12  |
| C8                                        | Ji Mai 19         | N/7+9/2+12   |

|     |                  |              |
|-----|------------------|--------------|
| C9  | Ji Mai 20        | 2*/7+9/2+12  |
| C10 | Ji Mai 27        | N/7+8/2+12   |
| C11 | Ji Mai 325       | N/7+9/5+10   |
| C12 | Ji Mai 3         | N/7+8/2+12   |
| C13 | Ji Mai 42        | N/7+9/2+12   |
| C14 | Ji Mai 7         | 2*/7+9/2+12  |
| C15 | Ji Mai 41        | N/7+9/2+12   |
| C16 | Ji Mai 86        | N/7+8/2+12   |
| C17 | Ji Mai 94        | 1/7+9/2+12   |
| C18 | Ji Mai 95        | 1/17+18/5+10 |
| C19 | Ji Mai 96        | 1/14+15/4+12 |
| C20 | Jing Sheng Mai 1 | 1/7+9/2+12   |
| C21 | Shi Mai 22       | N/7+9/2+12   |
| C22 | Shi Xin 618      | N/7+9/2+12   |
| C23 | Shi Xin 828      | N/7+8/2+12   |
| C24 | Yun Han 719      | N/7+9/5+10   |
| C25 | CA1062           | N/7+8/5+10   |
| C26 | Bei Jing 8       | N/7+8/2+12   |
| C27 | Cang Mai 028     | N/13+16/2+12 |
| C28 | Dong Xie 2       | N/7+9/2+12   |
| C29 | Feng Kang 2      | N/7+9/2+12   |
| C30 | Gao You 5766     | 1/7+8/5+10   |
| C31 | Han 4589         | N/7+9/2+12   |
| C32 | Han Nong 1412    | N/7+8/2+12   |
| C33 | Han You 3475     | 2*/7+9/5+10  |
| C34 | He Nong 130      | 2*/7+9/5+10  |
| C35 | He Nong 326      | N/7+9/2+12   |
| C36 | He Nong 58-3     | N/7+8/5+10   |
| C37 | He Nong 7069     | 1/7+8/5+10   |
| C38 | Heng 4338        | N/7+9/2+12   |
| C39 | Heng 6599        | N/14+15/2+12 |
| C40 | Heng S29         | N/7+9/2+12   |
| C41 | Ji Mai 17        | 1/7+9/2+12   |
| C42 | Ji Mai 26        | N/7+9/2+12   |
| C43 | Ji Mai 585       | 1/7+9/2+12   |
| C44 | Jie Mai 19       | 1/7+8/2+12   |
| C45 | Jin Feng 12-449  | 1/7+9/2+12   |
| C46 | Jin He 12-088    | 1/7+9/2+12   |
| C47 | Jin He 12-089    | 1/7+9/2+12   |
| C48 | Jin He 12-339    | 1/7+9/2+12   |
| C49 | Jin He 7178      | 1/7+8/2+12   |
| C50 | Jin He 8211      | 1/7+9/2+12   |
| C51 | Jin Tai 9923     | N/7+9/2+12   |
| C52 | Jing Ai 21       | N/7+9/2+12   |
| C53 | Jing Dong 18     | N/7+8/2+12   |
| C54 | Jing Dong 23     | N/7+8/2+12   |
| C55 | Jing Hua 11      | N/7+9/2+12   |

|      |                 |              |
|------|-----------------|--------------|
| C56  | Jing Nong 79-13 | N/7+9/2+12   |
| C57  | Nong Da 212     | N/6+8/2+12   |
| C58  | Nong Da 399     | 1/7+9/2+12   |
| C59  | Nong Da 408     | N/7+9/2+12   |
| C60  | Nong Da 4123    | N/7+9/2+12   |
| C61  | Nong Da 5363    | N/7+9/5+10   |
| C62  | Ping Yang 56    | 2*/7+8/5+12  |
| C63  | Shi Mai 14      | 1/7+9/2+12   |
| C64  | Shi Mai 18      | N/7+9/2+12   |
| C65  | Shi Nong 086    | N/7+8/5+10   |
| C66  | Tai 5902        | N/7+8/2+12   |
| C67  | Ying Bo 700     | N/7+8/5+10   |
| C68  | Yong Mai 3      | N/7+8/2+12   |
| C69  | Zhong Mai 113   | N/7+9/2+12   |
| C70  | Zhong Mai 1197  | N/7+9/2+12   |
| C71  | Zhong Mai 533   | 1/7+9/2+12   |
| C72  | Han Mai 9       | 1/14+15/2+12 |
| C73  | He Nong 215     | N/7+9/2+12   |
| C74  | Ji Mai 23       | 1/7+9/2+12   |
| C75  | Ji Mai 24       | N/7+9/2+12   |
| C76  | Jing Zuo 278    | N/7+9/2+12   |
| C77  | Bei Jing 8694   | N/7+9/2+12   |
| C78  | Bei Nong 2      | N/7+9/2+12   |
| C79  | Cang 6003       | N/7*+8/2+12  |
| C80  | Cang Mai 12     | 1/7+9/5+10   |
| C81  | Cang Mai 6001   | N/7+8/2+12   |
| C82  | Cang Mai 6005   | N/7*+8/2+12  |
| C83  | Feng Kang 13    | N/6+8/2+12   |
| C84  | Han 05-5092     | 1/14+15/2+12 |
| C85  | Han Dan 6050    | 1/7+9/2+12   |
| C86  | Han Mai 16      | 1/14+15/2+12 |
| C87  | Han Xuan 11     | N/7+8/5+10   |
| C88  | Han Xuan 12     | N/7+9/2+12   |
| C89  | Han Xuan 2      | N/7+8/5+10   |
| C90  | He Nong 6049    | N/7+9/2+12   |
| C91  | He Nong 7106    | 1/7+9/2+12   |
| C92  | He Nong 827     | 1/14+15/2+12 |
| C93  | He Nong 85-9    | N/7+9/2+12   |
| C94  | Heng 0816       | N/7+9/2+12   |
| C95  | Heng 08 Guan 29 | N/7+9/2+12   |
| C96  | Heng 136        | N/7+9/2+12   |
| C97  | Heng 4041       | N/7+9/2+12   |
| C98  | Heng 4399       | 1/14+15/2+12 |
| C99  | Heng 4444       | 1/14+15/2+12 |
| C100 | Heng 5229       | 1/7+9/2+12   |
| C101 | Heng 6632       | 1/7+9/2+12   |
| C102 | Heng 7228       | 2*/7+9/5+10  |

|      |                  |              |
|------|------------------|--------------|
| C103 | Heng 95 Guan 26  | 1/7+9/2+12   |
| C104 | Heng Shui 6404   | N/7+8/2+12   |
| C105 | Heng You 18      | 1/7+8/5+10   |
| C106 | Hua Bei 187      | N/7+9/2+12   |
| C107 | Ji 5265          | 1/7+9/2+12   |
| C108 | Ji Feng 703      | N/7+9/2+12   |
| C109 | Ji Mai 10        | N/7+9/2+12   |
| C110 | Ji Mai 18        | 1/7+9/2+12   |
| C111 | Ji Mai 29        | N/13+16/2+12 |
| C112 | Ji Mai 2         | N/6+8/2+12   |
| C113 | Ji Mai 36        | N/7+9/2+12   |
| C114 | Ji Mai 38        | N/7+8/2+12   |
| C115 | Ji Mai 418       | N/7+9/5+10   |
| C116 | Ji Mai 518       | N/7+9/2+12   |
| C117 | Ji Mai 6         | N/7+9/2+12   |
| C118 | Ji Mai 9         | N/7+8/2+12   |
| C119 | Jian 26          | 1/7+9/2+12   |
| C120 | Jin 2148-7       | N/7+8/2+12   |
| C121 | Jin Mai 13       | N/7+8/2+12   |
| C122 | Jin Mai 16       | N/7+9/2+12   |
| C123 | Jin Mai 17       | N/7+8/5+10   |
| C124 | Jin Mai 25       | N/7+8/5+10   |
| C125 | Jin Mai 33       | N/7+9/2+12   |
| C126 | Jin Mai 39       | N/7+8/5+10   |
| C127 | Jin Mai 44       | N/7+8/2+12   |
| C128 | Jin Mai 47       | N/7+9/5+10   |
| C129 | Jin Mai 50       | N/7+8/5+10   |
| C130 | Jin Mai 51       | N/7+8/2+12   |
| C131 | Jin Mai 53       | N/7+9/2+12   |
| C132 | Jin Mai 54       | N/7+9/2+12   |
| C133 | Jin Mai 60       | N/7+9/2+12   |
| C134 | Jin Mai 63       | N/7+8/2+12   |
| C135 | Jin Mai 68       | 2*/7+8/5+10  |
| C136 | Jin Mai 72       | 1/7+9/2+12   |
| C137 | Jin Mai 79       | N/7+9/2+12   |
| C138 | Jin Mai 91       | N/7+8/2+12   |
| C139 | Jin Mai 97       | N/7+9/5+10   |
| C140 | Jin Mai 97 (Han) | N/7+9/2+12   |
| C141 | Jin Tai 102      | N/7+9/2+12   |
| C142 | Jin Tai 182      | N/7+9/2+12   |
| C143 | Jing 411         | N/7+8/2+12   |
| C144 | Jing Dong 8      | N/7+9/2+12   |
| C145 | Jing He 9822     | N/7+8/2+12   |
| C146 | Jing Hua 1       | N/7+9/5+10   |
| C147 | Jing Shuang 16   | N/7+9/2+12   |
| C148 | Ke Yi 26         | N/7+8/2+12   |
| C149 | Lin 138          | N/7+8/2+12   |



|      |                    |              |
|------|--------------------|--------------|
| C150 | Lin Y7287          | 1/7+8/2+12   |
| C151 | Lin Fen 8050       | 1/7+8/5+10   |
| C152 | Lin Feng 3         | N/7+9/2+12   |
| C153 | Lin Feng 615       | N/7+9/2+12   |
| C154 | Lin Han 5089       | N/7+9/2+12   |
| C155 | Lin Han 5369       | N/7+8/5+10   |
| C156 | Lin Han 6105       | N/7+8/2+12   |
| C157 | Lin Han 917        | N/7+9/2+12   |
| C158 | Lin Han 935        | N/7+9/2+12   |
| C159 | Lin Kang 5108      | N/7+9/2+12   |
| C160 | Lin You 2069       | N/7+9/2+12   |
| C161 | Lun Kang 7         | N/7+9/2+12   |
| C162 | Lun Xuan 103       | N/7+9/5+10   |
| C163 | Nong Da 135        | N/7+9/2+12   |
| C164 | Nong Da 152        | 1/7+8/2+12   |
| C165 | Nong Da 155        | N/7+8/2+12   |
| C166 | Nong Da 183        | N/7+8/2+12   |
| C167 | Nong Da 2427       | N/7+9/2+12   |
| C168 | Nong Da 311        | N/7+9/2+12   |
| C169 | Nong Da 3492       | N/7+9/2+12   |
| C170 | Nong Da 36         | 1/7+8/5+10   |
| C171 | Nong Da 3634       | N/7+9/2+12   |
| C172 | Nong Da 3659       | N/7+9/2+12   |
| C173 | Ping Yang 348      | N/7+8/2+12   |
| C174 | Shi 4185           | 1/7+9/2+12   |
| C175 | Shi Jia Zhuang 407 | N/7+9/2+12   |
| C176 | Shi Jia Zhuang 8   | N/7+9/2+12   |
| C177 | Shi Mai 12         | 1/14+15/5+10 |
| C178 | Shi Mai 13         | N/7+9/2+12   |
| C179 | Shi Mai 15         | N/7+9/2+12   |
| C180 | Shi Mai 19         | 1/7+9/5+10   |
| C181 | Shi Xin 616        | 1/7+8/2+12   |
| C182 | Shi Xin 633        | 1/7+8/2+12   |
| C183 | Shun Mai 1718      | 1/14+15/5+10 |
| C184 | Tai 13606          | N/7+9/2+12   |
| C185 | Tai 712            | N/7+8/2+12   |
| C186 | Tai Yuan 566       | N/7+8/2+12   |
| C187 | Xiao Shan 8        | N/7/2+11     |
| C188 | Xiao Yan 54        | 1/14+15/2+12 |
| C189 | Xing Mai 6         | 1/14+15/2+12 |
| C190 | Yan 99102          | 1/7+8/5+10   |
| C191 | Yuan Dong 834      | N/7+8/2+12   |
| C192 | Yuan Dong 847      | N/14+15/2+12 |
| C193 | Chang 4640         | N/7+9/2+12   |
| C194 | Chang 4738         | N/6+8/5+10   |
| C195 | Chang 4853         | N/7+9/2+12   |
| C196 | Chang 5259         | 1/14+15/2+12 |

|      |                    |               |
|------|--------------------|---------------|
| C197 | Chang 6154         | N/7+8/2+12    |
| C198 | Chang 6359         | N/6+8/5+10    |
| C199 | Chang 6452         | N/7+8/2+12    |
| C200 | Chang 6794         | N/7+8/2+12    |
| C201 | Chang 6878         | 1/7+8/5+10    |
| C202 | Chang 8744         | N/7+9/2+12    |
| C203 | Chang Wu 89 (1)3-4 | N/7+8/2+12    |
| C204 | Chang Zhi 516      | N/7+8/2+12    |
| C205 | Chang Zhi 620      | N/7+8/5+10    |
| C206 | Zhong Mai 175      | N/7+9/2+12    |
| C207 | Zhong Mai 816      | N/7+8/2+12    |
| C208 | Zhong Mai 996      | N/7+8/2+12    |
| C209 | Zi You 6           | 1/7+8/5+10    |
| C210 | 05F3-244           | N/7+9/2+12    |
| C211 | 05F4-221           | N/7+8/5+10    |
| C212 | 05Z3-155           | N/7+8/5+10    |
| C213 | 06Z5-027           | N/14+15/5+10  |
| C214 | 09F4-252           | N/7+9/5+10    |
| C215 | 09F6-590           | 1/7+8/5+10    |
| C216 | 09F6-622           | 1/7+8/5+10    |
| C217 | 15A-191            | N/7+8/5+10    |
| C218 | 15 Chan A14        | N/7+9/5+10    |
| C219 | 15 Chan B14        | N/7+9/5+10    |
| C220 | 2010F6-541         | 1/7+9/2+12    |
| C221 | PH82-2-2           | 1/7/2+12      |
| C222 | PH85-16            | 1/14+15/2+12  |
| C223 | Gao You 503        | 1/7+8/2+12    |
| C224 | Gao You 5218       | 1/7+8/5+10    |
| C225 | Gao You 9409       | N/7+8/2+12    |
| C226 | Gao You 9415       | 1/7+8/5+10    |
| C227 | Gao You 9618       | 1/7+9/5+10    |
| C228 | Han 09-41344       | N/7+8/5+10    |
| C229 | Han 10-5223        | 1/7/5+10      |
| C230 | Han 7086           | 1/7+9/2+12    |
| C231 | Han Mai 14         | N/7+9/2+12    |
| C232 | He Nong 185        | 1/14+15/5+10  |
| C233 | He Nong 336        | 1/7+9/5+10    |
| C234 | He Nong 633        | 1/7+9/5+10    |
| C235 | Heng 2011 Guan 272 | N/7+9/5+10    |
| C236 | Heng S13-5022      | 1/7+9/5+10    |
| C237 | Ji Mai 541         | 1/7+8/5+10    |
| C238 | Ji Mai 738         | 1/7+8/5+10    |
| C239 | Jin Mai U80        | 1/7+8/5+10    |
| C240 | Ji Nuo 200         | N/7+8/2. 2+12 |
| C241 | Jin He 14-383      | 1/13+16/5+10  |
| C242 | Jin Nong 6         | 1/7+8/5+10    |
| C243 | Jing Hua 10        | N/7+9/2+12    |

|      |                |              |
|------|----------------|--------------|
| C244 | Ke Nong 2009   | 1/7+8/5+10   |
| C245 | Ke Nong 213    | 1/7+9/5+10   |
| C246 | Nong Da 5181   | 1/14+15/2+12 |
| C247 | Nong Da 6812   | N/7+8/2+12   |
| C248 | Shi 02-1       | N/7+9/2+12   |
| C249 | Shi 4045       | 1/7+8/5+10   |
| C250 | Shi U10-4045   | 1/7+8/5+10   |
| C251 | Shi U12-5241   | 1/7+9/2+12   |
| C252 | Shi You 17     | 1/7+9/5+10   |
| C253 | Shi You 20     | 1/7+8/5+10   |
| C254 | Yu Mai 13      | N/7+8/5+10   |
| C255 | Zhong You 206  | 1/7+9/5+10   |
| C256 | Zhong You 335  | N/7+9/2+12   |
| C257 | Zhong You 9507 | 1/7+9/5+10   |
| C258 | 04SS Fan 04    | 1/7+8/5+10   |
| C259 | 04SS Fan 08    | 1/7+8/5+10   |
| C260 | 04SS Fan 10    | 1/14+15/5+10 |
| C261 | 04 Chu 113     | 1/6+8/5+10   |
| C262 | 04 Chu 121     | 1/14+15/2+12 |
| C263 | 04 Chu 80      | 1/7+8/2+12   |
| C264 | 05Z4-004       | N/14+15/5+10 |
| C265 | 05Z4-020       | N/14+15/5+10 |
| C266 | 05Z4-031       | 1/14+15/5+10 |
| C267 | 05Z6-014       | 1/14+15/5+10 |
| C268 | 05Z6-369       | 1/7+8/5+10   |
| C269 | 05 Hei Chu 27  | 1/14+15/5+10 |
| C270 | 05 Hei Chu 8   | N/7+8/5+10   |
| C271 | 06Z6-040       | N/7+8/5+10   |
| C272 | 08F5-287       | N/7+9/5+10   |
| C273 | 08F5-59        | N/7+9/5+10   |
| C274 | Heng Guan 35   | N/7+9/2+12   |
| C275 | Ji Xian 3097   | N/7+8/2+12   |
| C276 | Ji 5579        | N/7/2+12     |
| C277 | Ji Zi 439      | N/14+15/5+10 |
| C278 | Jin He 13-294  | N/7+8/2+12   |
| C279 | Jin Mai 85     | N/7+8/2+12   |
| C280 | Jin Mai 88     | 1/14+15/5+10 |
| C281 | Jin Mai 89     | 1/7+8/5+10   |
| C282 | Jing Mai 9     | N/7+9/2+12   |
| C283 | Ke Nong 1002   | N/7+9/2+12   |
| C284 | Ke Nong 1006   | N/7+9/2+12   |
| C285 | Ke Nong 199    | N/7+9/2+12   |
| C286 | Ke Nong 2011   | N/7+9/2+12   |
| C287 | Ke Nong 9204   | N/14+15/2+12 |
| C288 | Ke Yi 5214     | N/14+15/2+12 |
| C289 | Lun Xuan 169   | N/7+9/2+12   |
| C290 | Nong Da 211    | N/6+8/2+12   |

|      |                   |              |
|------|-------------------|--------------|
| C291 | Nong Da 3432      | N/7+8/2+12   |
| C292 | Nong Da 413       | 1/13+16/5+10 |
| C293 | Nong Da 5182      | N/14+15/2+12 |
| C294 | Shun Mai 612      | N/14+15/2+12 |
| C295 | Tai 10604         | N/7+8/5+10   |
| C296 | Xing Mai 13       | 1/14+15/2+12 |
| C297 | Yan Da 1817       | N/7+8/2+12   |
| C298 | Yao Mai 16        | N/7+8/2+12   |
| C299 | Chang 5222        | N/7+8/2+12   |
| C300 | Chang Mai 251     | N/7+9/2+12   |
| C301 | Chang Mai 5973    | N/7+9/2+12   |
| C302 | Zhong Mai 12      | 1/7+8/5+10   |
| C303 | Zhong Xin Mai 9   | 1/17+18/5+10 |
| C304 | Zi You 5          | 1/7+8/2+12   |
| C305 | Ai Kang 58        | 1/7+8/5+10   |
| C306 | Ai Kang 58-1      | 1/7+8/5+10   |
| C307 | Luo Mai 21        | 1/7+9/2+12   |
| C308 | Luo Mai 6010      | 1/7+9/5+10   |
| C309 | Ping An 7         | N/7+8/2+12   |
| C310 | Ping An 8         | 1/7+9/2+12   |
| C311 | Shen Mai 1        | 1/7+8/5+10   |
| C312 | Xin Mai 29        | N/14+15/2+12 |
| C313 | Xin Mai 30        | 1/7+9/2+12   |
| C314 | Yan Gao 21        | N/7+9/2+12   |
| C315 | Yu Mai 18         | N/13+16/5+10 |
| C316 | Zheng Yu Mai 9989 | N/7+9/5+10   |
| C317 | Zhou Mai 22       | 1/7+9/2+12   |
| C318 | Zhou Mai 25       | 1/7+9/2+12   |
| C319 | Zhou Mai 32       | 1/7+9/5+10   |
| C320 | Zhou Mai 37       | 1/7+9/5+10   |
| C321 | Zhou Mai 38       | 1/7+9/5+10   |
| C322 | Zhou Mai 39       | N/7+8/5+10   |
| C323 | Zhou Mai 40       | 1/7+9/5+10   |
| C324 | Jun Mai 99-7      | 1/7+9/5+10   |
| C325 | Kai Mai 21        | 1/7/2+12     |
| C326 | Lan Kao Ai Zao 8  | N/7+9/2+12   |
| C327 | Nei Nong Ke 201   | 1/7+9/5+10   |
| C328 | Tian Min 198      | 1/14+15/5+10 |
| C329 | Wen 9629          | 1/7+9/2+12   |
| C330 | Xin Mai 208       | N/14+15/5+10 |
| C331 | Xu Ke 718         | 1/7+9/2+12   |
| C332 | Zhan 4110         | N/14+15/5+10 |
| C333 | Yu Jiao 5         | 1/7+9/5+10   |
| C334 | Yu Mai 158        | 1/7+9/5+10   |
| C335 | Yu Mai 16         | N/7+9/2+12   |
| C336 | Yu Mai 18         | N/14+15/5+10 |
| C337 | Yu Mai 34         | 1/7+8/5+10   |

|      |                 |              |
|------|-----------------|--------------|
| C338 | Yu Mai 416      | 1/7+8/5+10   |
| C339 | Zheng Feng 9962 | N/7+8/5+10   |
| C340 | Zheng Mai 101   | N/7+8/2+12   |
| C341 | Zhong Jiao 2    | N/7+8/2+12   |
| C342 | Zhong Luo 08-1  | 1/7+8/2+12   |
| C343 | Zhong Mai 998   | N/7+8/2+12   |
| C344 | Zhou Hei Mai 1  | N/7+8/2+12   |
| C345 | Zhou Mai 16     | N/7+9/2+12   |
| C346 | Zhou Mai 28     | 1/7+9/5+10   |
| C347 | Zhou Mai 30     | 1/7+9/2+12   |
| C348 | An Mai 1        | 1/14+15/5+10 |
| C349 | Guo Mai 301     | 1/14+15/5+10 |
| C350 | He Mai 2        | N/7+8/2+12   |
| C351 | Jun-16          | N/7+9/2+12   |
| C352 | Jun Xiao 9706   | 1/7+9/2+12   |
| C353 | Luo Han 10      | N/7+9/2+12   |
| C354 | Luo Han 11      | 1/7+8/2+12   |
| C355 | Luo Han 13      | N/7+9/2+12   |
| C356 | Luo Han 2       | 1/7+8/2+12   |
| C357 | Luo Han 3       | 1/7+9/2+12   |
| C358 | Luo Han 6       | N/7+8/2+12   |
| C359 | Luo Han 7       | 1/7+8/2+12   |
| C360 | Luo Mai 22      | 1/7+9/2+12   |
| C361 | Luo Mai 24      | N/7+8/5+10   |
| C362 | Luo Mai 26      | 1/7+9/5+10   |
| C363 | Luo Yang 8628   | N/7+8/2+12   |
| C364 | Luo Mai 18      | 1/7+9/2+12   |
| C365 | Luo Mai 7       | 1/7+9/2+12   |
| C366 | Luo You 7       | N/7+9/5+10   |
| C367 | Xin Mai 20      | N/7+8/2+12   |
| C368 | Xu Nong 5       | 1/7+9/2+12   |
| C369 | Yi Mai 6        | 1/7+9/2+12   |
| C370 | Yu Jiao Hei 1   | 2*/7+9/5+10  |
| C371 | Yu Mai 29       | N/7+8/2+12   |
| C372 | Yu Mai 38       | 1/7+8/2+12   |
| C373 | Yu Mai 48       | N/7+8/2+12   |
| C374 | Yu Mai 50       | 1/7+9/2+12   |
| C375 | Yu Mai 8        | 1/7+9/2+12   |
| C376 | Yu Nong 211     | N/13+16/5+10 |
| C377 | Yu Nong 949     | 1/7+8/5+10   |
| C378 | Yu Zhan 4       | 1/7+9/2+12   |
| C379 | Zheng Nong 17   | 1/7+9/5+10   |
| C380 | Ji Mai 4        | 1/13+16/5+10 |
| C381 | Xin Mai 18      | 1/7+9/5+10   |
| C382 | Xin Mai 26      | 1/7+8/5+10   |
| C383 | Xin Mai 28      | 1/7+9/5+10   |
| C384 | Xin Mai 1998    | 1/14+15/5+10 |

|      |                          |               |
|------|--------------------------|---------------|
| C385 | Yan Zhan 1               | N/14+15/5+10  |
| C386 | Yu Nong 6326             | 1/7+9/5+10    |
| C387 | Zheng Mai 0856           | N/7+9/5+10    |
| C388 | Zheng Mai 119            | 1/7+8/5+10    |
| C389 | Zheng Mai 1325           | N/7+9/5+10    |
| C390 | Zheng Mai 366            | 1/7+8/5+10    |
| C391 | Zheng Mai 98             | 1/14+15/5+10  |
| C392 | Zhou Mai 19              | 1/7+9/5+10    |
| C393 | Zhou Mai 24              | 1/7+9/2+12    |
| C394 | Zhou Mai 33              | 1/7+8/5+10    |
| C395 | Zhou Mai 35              | 1/7+8/5+10    |
| C396 | Lan Kao 198              | 1/13+16/5+10  |
| C397 | Yu Mai 13                | 1/7+8/5+10    |
| C398 | Yu Mai 21                | 2*/7+9/5+10   |
| C399 | Yu Mai 982               | 1/7+9/5+10    |
| C400 | Zheng Mai 0943           | N/7+9/5+10    |
| C401 | Zheng Mai 761            | N/7+9/2+12    |
| C402 | Zhou Mai 18              | 1/7+9/2+12    |
| C403 | You Zi Tou               | N/7+8/2+12    |
| C404 | Luo Mai 29               | 2*/13+16/5+10 |
| C405 | Luo Mai 618              | N/7+8/5+10    |
| C406 | Zheng Mai 2012 H14-23-21 | N/7+9/5+10    |
| C407 | Zhou Kou 803             | 1/7+9/5+10    |
| C408 | Zhou Kou 608             | 1/7+9/5+10    |
| C409 | Ji Yan Mai 06039         | 1/7+9/2+12    |
| C410 | Luo Mai 31               | 1/7+9/5+10    |
| C411 | Luo Mai 906              | 1/7+9/2+12    |
| C412 | Xin Mai 12037-47-12      | N/7+8/5+10    |
| C413 | Ji Yan Mai 10            | 1/7+8/5+10    |
| C414 | Zhou 37                  | 1/7+9/5+10    |
| C415 | Luo Mai 36               | 1/7+9/2+12    |
| C416 | Luo Mai 903              | 1/7+8/2+12    |
| C417 | Luo Mai 27               | 1/7+9/5+10    |
| C418 | Wan Ke 06229             | N/7+8/5+10    |
| C419 | Fu Mai 936               | 1/7+9/5+10    |
| C420 | Wan Mai 50               | 1/7+9/2+12    |
| C421 | Ping An 6                | N/7+8/2+12    |
| C422 | Zhong Tai 1              | 1/7+9/5+10    |
| C423 | Xin Mai 13               | 1/7+8/5+10    |
| C424 | Tai Kong 7               | N/7+9/2+12    |
| C425 | Dong Feng 1611-1         | N/17+18/2+12  |
| C426 | Dong Feng 1611-2         | N/7+9/2+12    |
| C427 | Xi Nong 2208             | 1/7+8/2+12    |
| C428 | Xiao Yan 22              | 1/7+9/2+12    |
| C429 | Yan Mai 8911             | N/7+9/2+12    |
| C430 | Wan Mai 38               | 1/7+8/5+12    |
| C431 | Yu Mai 20                | 1/7+8/4+12    |

|      |                   |              |
|------|-------------------|--------------|
| C432 | Jing Dong 6       | N/7+9/2+12   |
| C433 | Lun Kang 6        | N/7+9/2+12   |
| C434 | Jing 437          | N/7+8/2+10   |
| C435 | Heng Mai 1        | 1/7+9/2+12   |
| C436 | Fu Zhuang 30      | N/7+8/2+12   |
| C437 | Wan Ke 06230      | N/7+8/5+10   |
| C438 | Fu Mai 937        | 1/7+9/5+10   |
| C439 | Wan Mai 51        | 1/7+9/2+12   |
| C440 | Ping An 7         | N/7+8/2+12   |
| C441 | Shan Xi 107       | 1/7+8/2+12   |
| C442 | Lu Mai 1          | 1/7+8/2+12   |
| C443 | Xi Nong 6028      | N/7+8/2+10   |
| C444 | Fu Mai 368        | N/7+8/2+12   |
| C445 | Yu Nong 98        | 1/7+8/2+12   |
| C446 | Luo Mai 163       | 1/7+9/5+12   |
| C447 | Lun Xuan 0378     | N/7+9/2+12   |
| C448 | Shan Nong A064-11 | N/7+8/2+12   |
| C449 | Shan Nong A52-2   | N/7+8/2+12   |
| C450 | Shan Nong A079-8  | N/7+8/5+12   |
| C451 | Shan Nong 076-2   | N/7+8/5+12   |
| C452 | Shi Mai 22        | N/6+8/2+12   |
| C453 | Xing Mai 16       | 1/7+8/2+12   |
| C454 | Xu Mai 6          | 1/7+9/2+12   |
| C455 | Zhou Mai 26       | 1/7+9/5+10   |
| C456 | Ke 9328           | N/7+8/5+10   |
| C457 | Quan Mai 4        | 1/7+9/2+12   |
| C458 | Quan Mai 523      | 1/7+9/2+12   |
| C459 | Ji Mai 181        | N/7+8/5+10   |
| C460 | Zhong Mai 817     | N/7+8/2+12   |
| C461 | Ji Mai 817        | N/7+8/5+12   |
| C462 | Pu Bing 1         | N/7+8/2+12   |
| C463 | Jing Hua 93       | N/7+9/2+12   |
| C464 | Xi Nong 126       | 1/7+8/2+12   |
| C465 | Pu Bing 2         | N/7+8/2+12   |
| C466 | Rong You 5386     | 1/13+16/5+10 |
| C467 | Heng Guan 35      | N/7+9/2+12   |
| C468 | Zhong Mai 145     | N/7+8/2+10   |
| C469 | Fu Mai 1576       | 1/7+9/2+12   |
| C470 | Heng 5-29         | N/7+9/2+12   |
| C471 | Ai 128            | N/7+8/5+10   |
| C472 | Xing Mai 19       | 1/7+9/2+10   |
| C473 | Zhou Mai 27       | N/7+9/5+12   |
| C474 | Huai Chuan 918    | N/7+9/5+12   |
| C475 | Zheng Mai 1354    | 1/7+9/5+10   |
| C476 | Ji Mai 325        | N/7+9/5+10   |
| C477 | Ji Mai 419        | 1/7+9/5+10   |
| C478 | Xi Nong 07K1321   | N/7+8/2+10   |

|                                             |                     |              |
|---------------------------------------------|---------------------|--------------|
| C479                                        | Zhou Mai 25         | 1/7+9/2+12   |
| C480                                        | Xi Nong 611         | N/7+8/2+10   |
| C481                                        | Xian Mai 8          | N/7+8/2+10   |
| C482                                        | Shi Xin 5071        | N/7+8/2+12   |
| C483                                        | Xing Mai 19         | 1/7+9/5+10   |
| C484                                        | Zhou Mai 30         | 1/7+9/2+12   |
| C485                                        | Qiu Le 1302         | N/7+8/2+12   |
| C486                                        | Jing Fu Mai 1       | N/7+9/5+10   |
| C487                                        | Heng 4444           | 1/14+15/2+12 |
| C488                                        | Ke 9301             | N/7+8/5+10   |
| C489                                        | Zhou Mai 28         | 1/7+9/5+12   |
| C490                                        | Zhong Mai 875       | 1/7+9/2+12   |
| C491                                        | Ji Mai 120          | N/7+9/5+10   |
| C492                                        | Luo 6010            | 1/7+8/5+10   |
| C493                                        | Heng 136            | N/7+9/2+12   |
| C494                                        | Zhou Mai 8425       | 1/7/2+12     |
| C495                                        | Shi Xin 6171        | N/7+8/2+12   |
| C496                                        | Zhou Mai 32         | 1/7+9/5+10   |
| C497                                        | Wei Long 169        | 1/7+8/5+10   |
| C498                                        | Ji Mai 631          | 1/7+8/5+10   |
| C499                                        | Luo He 6010         | N/7+8/5+10   |
| C500                                        | Fu Mai 128          | N/7+8/2+12   |
| C501                                        | Lun Xuan Yi         | 1/7+9/2+12   |
| C502                                        | Xi Nong 889         | N/7+9/2+12   |
| C503                                        | Ji Mai 22           | 1/7+9/2+12   |
| C504                                        | Heng 6632           | N/7+8/2+10   |
| <b>131 commercial varieties from MLYWWR</b> |                     |              |
| C505                                        | Bai Nong 418        | 1/7+8/5+10   |
| C506                                        | Bai Nong 3217       | 1/7+8/2+12   |
| C507                                        | Zhu Mai 6           | 1/7+9/5+10   |
| C508                                        | Wan Mai 716         | N/7+8/2+12   |
| C509                                        | Xian Mai 10         | N/7+8/2+12   |
| C510                                        | Bai Nong 160        | 1/7+9/5+10   |
| C511                                        | Wan Mai 16          | N/7+8/2+12   |
| C512                                        | Wan Mai 20          | 1/7+8/5+10   |
| C513                                        | Zheng Mai 9023      | 1/7+9/5+10   |
| C514                                        | Zheng Mai 9023-1    | 1/7+8/2+12   |
| C515                                        | Bai Nong 228        | N/7+9/2+12   |
| C516                                        | Bai Nong Chun Guang | N/7+9/5+10   |
| C517                                        | Zhu Mai 669         | 1/7+9/2+12   |
| C518                                        | Zhu Mai 358         | 1/7+9/5+10   |
| C519                                        | Wan 1643            | N/7+8/4+12   |
| C520                                        | Bai Nong 5822       | 1/7+9/5+10   |
| C521                                        | Zhu Mai 305         | 2*/7+9/2+12  |
| C522                                        | Wan Mai 19          | 1/7+9/2+12   |
| C523                                        | Xin Mai 79          | 1/7+8/2+12   |
| C524                                        | D9401               | N/14+15/2+12 |



|      |                  |              |
|------|------------------|--------------|
| C525 | E 2078           | N/7+8/5+10   |
| C526 | E 402            | N/14+15/2+12 |
| C527 | E 48359          | N/7+8/2+12   |
| C528 | E 55072          | N/7/5+10     |
| C529 | E 76331          | N/7/2+12     |
| C530 | E 82026          | 1/7+8/2+12   |
| C531 | E 91-1032        | N/7+8/2+12   |
| C532 | E 94-5036        | N/7+9/2+12   |
| C533 | E En 1           | N/7+8/2+12   |
| C534 | E En 5           | N/7+8/2+12   |
| C535 | E Mai 6          | N/7+8/2+12   |
| C536 | E Mai 7          | N/7+8/2+12   |
| C537 | E Mai 11         | 1/14+15/2+12 |
| C538 | E Mai 12         | N/7+8/2+12   |
| C539 | E Mai 14         | 1/14+15/2+12 |
| C540 | E Mai 17         | N/7+9/5+10   |
| C541 | E Mai 18         | 1/14+15/2+12 |
| C542 | E Mai 19         | N/7+9/2+12   |
| C543 | E Mai 20         | N/7+8/5+10   |
| C544 | Gang 9622        | 1/7+8/2+12   |
| C545 | Gang 9865        | N/7+9/2+12   |
| C546 | Hua 9914         | 1/7+8/2+12   |
| C547 | Hua Mai 8        | N/7+8/2+12   |
| C548 | Jing 35          | N/7+9/5+10   |
| C549 | Jing 66          | 1/7+8/2+12   |
| C550 | S048             | N/7+9/2+12   |
| C551 | Sha Yang 9302-12 | N/7+8/2+12   |
| C552 | Wan 369          | N/7+9/5+10   |
| C553 | Wu Da 1032       | N/7+8/5+12   |
| C554 | Wu Da 311        | N/7+8/2+12   |
| C555 | Wu Da 312        | 1/7+8/2+12   |
| C556 | Xiang Mai 8      | 1/7+8/2+12   |
| C557 | Xiang Nong 46619 | 1/7+8/5+10   |
| C558 | Yi 95218         | N/7+8/5+10   |
| C559 | Yi Bin 1         | 1/14+15/2+12 |
| C560 | Zheng 98         | 1/7+8/5+10   |
| C561 | 5390             | 1/7/2+12     |
| C562 | 13397            | 2*/7+8/5+10  |
| C563 | 323              | N/7+8/5+10   |
| C564 | 8207             | N/7+9/5+10   |
| C565 | 86004            | 1/7+9/2+12   |
| C566 | 97-597           | N/7+8/2+12   |
| C567 | 98005            | N/7+8/2+12   |
| C568 | 9856             | N/7+8/2+12   |
| C569 | Yang 06G5        | N/7+9/2+12   |
| C570 | Yang 06G86       | 1/7+8/2+12   |
| C571 | Yang 06-164      | N/7+9/2+12   |

|      |                    |               |
|------|--------------------|---------------|
| C572 | Yang Fu Mai 5242-1 | N/7+8/2+12    |
| C573 | Yang Fu Mai 5242-2 | N/7+9/2+12    |
| C574 | Nan Nong 06y86     | N/7+8/5+10    |
| C575 | Zhen 05185         | 1/7+9/5+10    |
| C576 | Yang Mai 18        | 1/7+8/2+12    |
| C577 | Hua Mai 0460-1     | N/7+8/2+12    |
| C578 | Hua Mai 0460-2     | N/7+9/2+12    |
| C579 | Hua Mai 0480-1     | N/7+8/2+12    |
| C580 | Hua Mai 0480-2     | N/7+9/2+12    |
| C581 | Ning 13            | 1/7+8/2+12    |
| C582 | Ning 6E125         | 1/7+8/2+12    |
| C583 | Ning 0569          | 1/7+8/2+12    |
| C584 | Ning 15-1          | 1/7+9/5+10    |
| C585 | Ning 15-2          | 1/7+8/5+10    |
| C586 | Hua Mai 2566-1     | N/7+8/2+12    |
| C587 | Hua Mai 2566-2     | 1/7+9/2+12    |
| C588 | Hua Mai 2668       | 1/7+8/2+12    |
| C589 | Xiang Mai 55-1     | N/7+8/2+12    |
| C590 | Xiang Mai 55-2     | N/7+8/5+10    |
| C591 | Mian Mai 41-1      | N/7+8/2+12    |
| C592 | Mian Mai 41-2      | N/7+9/2+12    |
| C593 | Mian Mai 41-3      | N/7+9/5+10    |
| C594 | Chuan Mai 50-1     | N/7+9/5+10    |
| C595 | Chuan Mai 50-2     | 1/7+9/5+10    |
| C596 | Yang Mai 158       | N/7+8/2+12    |
| C597 | Xi Fu 9            | 1/17+18/2+12  |
| C598 | Mian Yang 28       | N/7+9/2+12    |
| C599 | Yi Bin 6           | N/7+8/2+12    |
| C600 | Mian Nong 2        | 1/17+18/5+10  |
| C601 | Ai Mai 58          | N/7+8/2+12    |
| C602 | Xu Zhou 211-1      | N/7+8/2+12    |
| C603 | Xu Zhou 211-2      | N/7+8/5+10    |
| C604 | Su 8637-1          | 1/20/5+10     |
| C605 | Su 8637-2          | 1/20/5+10     |
| C606 | Yang 9856-1        | 1/7+8/5+10    |
| C607 | Yang 9856-2        | N/7+9/5+10    |
| C608 | Huai Mai 12-1      | N/7+8/2+12    |
| C609 | Ning 9415          | 2*/7+8/5+10   |
| C610 | Ning 9231-1        | N/7+9/5+10    |
| C611 | Ning 9231-2        | N/7+8/2. 2+12 |
| C612 | Ning 93-12-1       | N/7+8/5+10    |
| C613 | Ning 93-12-2       | N/7+8/5+10    |
| C614 | Ning 93-12-3       | N/14+15/2+12  |
| C615 | Ning 93-12-4       | 1/7+8/2+12    |
| C616 | Yang 87-158        | N/7+8/2+12    |
| C617 | E Mai 398          | N/7+8/2+12    |
| C618 | Xiang Mai 62       | 1/7+9/2+12    |

|                                           |                  |              |
|-------------------------------------------|------------------|--------------|
| C619                                      | E Mai 398        | N/7+8/2+12   |
| C620                                      | E Mai 195        | 2*/7+8/5+10  |
| C621                                      | Zhong Mai 817    | N/7+8/5+10   |
| C622                                      | Yang Fu 4        | 1/7+8/2+12   |
| C623                                      | Mian Mai 618     | N/7+9/5+10   |
| C624                                      | Yang Fu 5        | N/7+8/2+12   |
| C625                                      | E Mai 18         | 1/20/5+10    |
| C626                                      | Wan You 2        | 1/7+8/5+10   |
| C627                                      | Xian Mai 8       | N/7+8/2+10   |
| C628                                      | E Mai 195        | N/7+8/5+10   |
| C629                                      | Yang Mai 25      | 1/7+8/2+12   |
| C630                                      | E Mai 98         | 1/7+8/2+12   |
| C631                                      | Mian Mai 07-131  | N/7+9/2+10   |
| C632                                      | Xiang Mai 031    | N/7+9/5+10   |
| C633                                      | Nan Nong 14-8106 | N/7+8/2+12   |
| C634                                      | Chu 0701         | N/7+8/2+10   |
| C635                                      | Jin Wan 999      | N/7+8/2+12   |
| <b>133 commercial varieties from SWWR</b> |                  |              |
| C636                                      | Ke Cheng Mai 1   | N/7+8/5+10   |
| C637                                      | Mian Mai 367     | N/13+16/2+12 |
| C638                                      | Mian Mai 37      | N/7+9/5+10   |
| C639                                      | Mian Mai 38      | N/7+8/5+10   |
| C640                                      | Mian Nong 4      | 1/17+18/5+10 |
| C641                                      | Mian Yang 11     | 1/7+8/5+10   |
| C642                                      | Mian Yang 21     | 1/7+8/5+10   |
| C643                                      | Mian Yang 24     | N/7+9/2+12   |
| C644                                      | Mian Yang 25     | N/7+8/5+10   |
| C645                                      | Mian Yang 26     | N/7+9/5+10   |
| C646                                      | Mian Yang 27     | N/7+9/2+12   |
| C647                                      | Mian Yang 29     | N/7+9/2+12   |
| C648                                      | Mian Yang 30     | N/7+9/2+12   |
| C649                                      | Mian Yang 32     | 1/7+8/5+10   |
| C650                                      | Mian Yang 33     | N/7+8/5+10   |
| C651                                      | Mian Yang 35     | N/17+18/5+10 |
| C652                                      | Nei Mai 11       | N/7+9/2+12   |
| C653                                      | Xi Ke Mai 1      | N/17+18/2+12 |
| C654                                      | Xi Ke Mai 3      | N/7+8/2+12   |
| C655                                      | Xi Ke Mai 5      | N/7+8/2+12   |
| C656                                      | Ya An Zao        | 1/7+8/2+12   |
| C657                                      | Yi Mai Yi        | 1/7+8/5+10   |
| C658                                      | Yu 03062         | N/7+8/5+10   |
| C659                                      | Yu Mai 10        | N/7+8/2+12   |
| C660                                      | Yu Mai 11        | N/17+18/5+10 |
| C661                                      | Yu Mai 7         | 1/14+15/2+12 |
| C662                                      | Yu Mai 9         | 1/14+15/5+10 |
| C663                                      | MR11-12          | N/7+9/5+10   |
| C664                                      | An Mai 7         | N/7+9/2+12   |

|      |                    |              |
|------|--------------------|--------------|
| C665 | Bi Mai 18          | 1/7+9/2+12   |
| C666 | Chang Mai 26       | 1/14+15/2+12 |
| C667 | Chang Mai 28       | 1/13+16/2+12 |
| C668 | Chuan Mai 30       | 1/7+8/2+12   |
| C669 | Chuan Mai 32       | 1/13+16/2+12 |
| C670 | Chuan Mai 37       | N/7+9/2+12   |
| C671 | Chuan Mai 38       | N/6+8/2+12   |
| C672 | Chuan Mai 42       | 1/6+8/5+10   |
| C673 | Chuan Mai 44       | 1/7+8/5+10   |
| C674 | Chuan Mai 45       | N/7+9/2+12   |
| C675 | Chuan Mai 47       | N/13+16/2+12 |
| C676 | Chuan Mai 51       | 1/7+8/2+12   |
| C677 | Chuan Mai 53       | 1/7+8/2+12   |
| C678 | Chuan Mai 55       | N/13+16/5+10 |
| C679 | Chuan Mai 56       | 1/13+16/5+10 |
| C680 | Chuan Mai 58       | 1/6+8/2+12   |
| C681 | Chuan Mai 61       | N/7+8/2+12   |
| C682 | Chuan Mai 63       | 1/7+8/2+12   |
| C683 | Chuan Mai 65       | 1/7+8/5+10   |
| C684 | Chuan Mai 67       | N/6+8/2+12   |
| C685 | Chuan Mai 80       | 1/6+8/2+12   |
| C686 | Chuan Mai 81       | 1/6+8/2+12   |
| C687 | Chuan Mai 91       | 1/6+8/2+12   |
| C688 | Chuan Mai 92       | 1/6+8/5+10   |
| C689 | Chuan Nong 17      | 1/7+9/5+10   |
| C690 | Chuan Nong 18      | N/7+9/2+12   |
| C691 | Chuan Nong 19      | N/7+8/2+12   |
| C692 | Chuan Nong 21      | 1/6+8/5+10   |
| C693 | Chuan Nong 24      | 1/7+9/2+12   |
| C694 | Chuan Nong 26      | N/7+8/2+12   |
| C695 | Chuan Nong 27      | N/7+8/2+12   |
| C696 | Chuan Shuang Mai 1 | N/7/5+10     |
| C697 | Chuan Yu 16        | 1/14+15/5+10 |
| C698 | Chuan Yu 17        | N/7+9/2+12   |
| C699 | Chuan Yu 18        | 1/7/2+12     |
| C700 | Chuan Yu 19        | N/7+9/2+12   |
| C701 | Chuan Yu 20        | 1/14+15/5+10 |
| C702 | Chuan Yu 21        | 1/14+15/2+12 |
| C703 | Chuan Yu 23        | 1/7+9/5+10   |
| C704 | Fan 6              | N/14+15/2+12 |
| C705 | Gui Nong 10        | N/7+9/2+12   |
| C706 | Gui Nong 28        | N/7+8/5+10   |
| C707 | Guo Mai 15         | N/7+8/5+10   |
| C708 | Ke Cheng Mai 2     | N/14+15/2+12 |
| C709 | Ke Cheng Mai 4     | N/14+15/2+12 |
| C710 | Ke Cheng Mai 5     | N/7+9/2+12   |
| C711 | Le Mai 3           | N/7+8/2+12   |

|      |                   |              |
|------|-------------------|--------------|
| C712 | Liang Mai 2       | 1/14+15/5+10 |
| C713 | Liang Mai 3       | 1/6+8/2+12   |
| C714 | Liang Mai 4       | N/7+8/2+12   |
| C715 | Mian Mai 1403     | N/7+8/5+10   |
| C716 | Mian Mai 228      | 1/6+8/2+12   |
| C717 | Mian Mai 285      | N/6+8/5+10   |
| C718 | Mian Mai 39       | 1/17+18/5+10 |
| C719 | Mian Mai 40       | N/7+9/5+10   |
| C720 | Mian Mai 41       | N/7+8/5+10   |
| C721 | Mian Mai 42       | N/7+9/2+12   |
| C722 | Mian Mai 43       | N/7+8/5+10   |
| C723 | Mian Mai 45       | N/7+8/5+10   |
| C724 | Mian Mai 46       | N/7+9/5+10   |
| C725 | Mian Mai 48       | N/7/5+10     |
| C726 | Mian Mai 51       | N/6+8/5+10   |
| C727 | Mian Nong 7       | N/7+9/2+12   |
| C728 | Mian Yang 12      | N/17+18/2+12 |
| C729 | Nan 30-10         | N/7+9/2+12   |
| C730 | Nan Mai 618       | 1/14+15/5+10 |
| C731 | Nei Mai 8         | N/7+9/5+10   |
| C732 | Nei Mai 9         | N/7+9/5+10   |
| C733 | Qian Mai 19       | 1/14+15/2+12 |
| C734 | Rong Mai 3        | N/17+18/5+10 |
| C735 | Rong Mai 4        | N/14+15/2+12 |
| C736 | Shu Mai 482       | 1/7+9/5+10   |
| C737 | Te Yan Mai Nan 88 | N/14+15/5+10 |
| C738 | Xi Chang 19       | 1/14+15/2+12 |
| C739 | Xi Fu 12          | N/17+18/5+10 |
| C740 | Xi Fu 13          | N/17+18/5+10 |
| C741 | Xi Ke Mai 2       | 1/14+15/2+12 |
| C742 | Xi Ke Mai 4       | N/7+8/2+12   |
| C743 | Xi Ke Mai 6       | 1/7+9/5+10   |
| C744 | Xi Ke Mai 9       | N/7+9/5+10   |
| C745 | Xian Mai 99       | N/7+8/5+10   |
| C746 | Zhong Ke Mai 138  | 1/6+8/2+12   |
| C747 | Zi Mai 1          | 1/14+15/2+12 |
| C748 | PZ15-21           | 1/14+15/2+12 |
| C749 | PZ15-3            | 1/7+9/2+12   |
| C750 | PZ15-4            | 1/14+15/2+12 |
| C751 | Chuan Mai 36      | 2*/7+9/5+10  |
| C752 | Chuan Mai 41      | N/7+8/2+12   |
| C753 | Chuan Mai 66      | N/6+8/2+12   |
| C754 | Chuan Mai 68      | 1/6+8/5+10   |
| C755 | Gui Nong 29       | N/7+9/2+12   |
| C756 | Qian Mai 20       | N/7+8/5+10   |
| C757 | Qian Xing Mai 1   | 1/7+9/2+12   |
| C758 | Rong Mai 2        | 1/14+15/2+12 |

|                                          |               |              |
|------------------------------------------|---------------|--------------|
| C759                                     | Yu Mai 1      | 1/7+8/2+12   |
| C760                                     | Chuan Mai 33  | N/7+9/2+12   |
| C761                                     | Chuan Mai 46  | 1/7+9/5+10   |
| C762                                     | Chuan Mai 64  | 1/6+8/5+10   |
| C763                                     | Qian Mai 17   | 1/7+9/2+12   |
| C764                                     | Wu Yi Mai     | 1/7+9/2+12   |
| C765                                     | Yi Mai 8      | 1/6+8/5+10   |
| C766                                     | Ben Di Mai    | N/7+8/2+12   |
| C767                                     | Mian Mai 31   | 1/7+8/5+10   |
| C768                                     | Yun Mai 34    | N/7+9/2+12   |
| <b>158 commercial varieties from NSW</b> |               |              |
| C769                                     | Y20           | 2*/7+8/5+10  |
| C770                                     | Xin Chun 6    | N/7+9/2+12   |
| C771                                     | Xin Chun 8    | N/7+8/2+12   |
| C772                                     | Xin Chun 9    | N/7+9/5+10   |
| C773                                     | Xin Chun 10   | N/7+8/2+12   |
| C774                                     | Xin Chun 11   | N/7+8/2+12   |
| C775                                     | Xin Chun 12   | 2*/6+8/2+10  |
| C776                                     | Xin Chun 13   | N/13+16/2+12 |
| C777                                     | Xin Chun 14   | N/7/2+12     |
| C778                                     | Xin Chun 15   | 1/7+8/2+12   |
| C779                                     | Xin Chun 16   | N/7+8/2+12   |
| C780                                     | Xin Chun 17   | N/7+9/5+10   |
| C781                                     | Xin Chun 18   | N/7+8/2+12   |
| C782                                     | Xin Chun 19   | N/7+8/5+10   |
| C783                                     | Xin Chun 20   | N/7+8/2+12   |
| C784                                     | Xin Chun 21   | N/7+8/2+12   |
| C785                                     | Xin Chun 24   | 1/17+18/2+12 |
| C786                                     | Xin Chun 25   | N/17+18/2+12 |
| C787                                     | Ning Chun 6   | 1/17+18/5+10 |
| C788                                     | Ba Chun 6     | N/7+8/2+12   |
| C789                                     | Chang Chun 6  | 1/7+8/2+12   |
| C790                                     | Tu Chun 9     | 1/7+8/2+12   |
| C791                                     | Shi Dong 7    | N/7+8/2+12   |
| C792                                     | Shi Dong 8    | N/7+8/2+12   |
| C793                                     | Shi Dong 9    | N/6+8/2+12   |
| C794                                     | Xiao yan 22-1 | N/7+9/2+12   |
| C795                                     | Xiao yan 54   | 1/14+15/2+12 |
| C796                                     | Xin Dong 17   | N/7+8/2+12   |
| C797                                     | Xin Dong 18   | N/7+8/5+10   |
| C798                                     | Xin Dong 22   | 2*/7+8/5+10  |
| C799                                     | Xin Dong 23   | N/7+8/2+12   |
| C800                                     | Xin Dong 24   | 2*/7+8/5+10  |
| C801                                     | Xin Dong 24   | N/7+9/5+10   |
| C802                                     | Xi Nong 88    | 1/7+8/2+12   |
| C803                                     | Ka Shi Bai Pi | N/7+8/2+12   |
| C804                                     | Xiao Hei Mai  | N/7+9/5+10   |

|      |                  |              |
|------|------------------|--------------|
| C805 | Long Mai 26      | 2*/7+9/5+10  |
| C806 | Gan Mai 32       | N/7+8/2+11   |
| C807 | Gan Chun 18      | N/7+8/2+11   |
| C808 | Yong Liang 12    | N/7+8/2+11   |
| C809 | Long Chun 1      | N/7+8/2+11   |
| C810 | Long Chun 7      | N/7+8/2+11   |
| C811 | Wu Chun 1        | N/7+8/2+12   |
| C812 | Gan Mai 15       | N/7+8/2+12   |
| C813 | Gan Mai 23       | N/7+8/2+12   |
| C814 | Gan Mai 39       | N/7+8/2+12   |
| C815 | Zhang Chun 9     | N/7+8/2+12   |
| C816 | Zhang Chun 13    | N/7+8/2+12   |
| C817 | Zhang Chun 15    | N/7+8/2+12   |
| C818 | Zhang Chun 18    | N/7+8/2+12   |
| C819 | Gao Yuan 506     | N/7+8/2+12   |
| C820 | A Bo             | N/7+8/2+12   |
| C821 | Hui Se A Fu      | N/7+8/2+12   |
| C822 | C8145            | N/7+8/2+12   |
| C823 | Long Chun 10     | N/7+9/2+10   |
| C824 | Gao Yuan 338     | N/7+9/2+12   |
| C825 | Gao Yuan 602     | N/7/2+11     |
| C826 | Zhang Chun 16    | N/7/5+10     |
| C827 | Ao Li Sen Ke 14  | N/22/2+12    |
| C828 | Wu Chun 2        | 1/7+8/5+10   |
| C829 | Gan Chun 20      | 1/7+8/5+10   |
| C830 | Gan Mai 42       | 1/7+8/5+10   |
| C831 | 1032 Zhuang Feng | 1/7+8/5+10   |
| C832 | Gan Mai 60       | 1/7+8/2+11   |
| C833 | Jin 214          | 1/7+8/2+11   |
| C834 | Gan Mai 8        | 1/7+8/2+12   |
| C835 | Long Chun 8      | 1/7+8/2+12   |
| C836 | Wu Chun Hong     | 1/7+8/2+12   |
| C837 | Zhang Chun 10    | 1/7+8/2+12   |
| C838 | A Fu             | 1/17+18/2+11 |
| C839 | Yong Liang 4     | 1/17+18/5+10 |
| C840 | Long Mai 27      | 2*/7+9/5+11  |
| C841 | Gan Mai 33       | N/7+8/2+11   |
| C842 | Gan Chun 19      | N/7+8/2+11   |
| C843 | Yong Liang 13    | N/7+8/2+11   |
| C844 | Long Chun 13     | N/7+8/2+11   |
| C845 | 8133             | 1/7+9/2+12   |
| C846 | 879              | 1/7+8/2+12   |
| C847 | 0906—19          | N/7+9/2+12   |
| C848 | 938              | N/7+9/2+12   |
| C849 | C14              | 1/7+9/2+12   |
| C850 | E40—2            | 1/7+8/2+12   |
| C851 | E4—8             | 1/7+8/2+12   |

|      |                 |             |
|------|-----------------|-------------|
| C852 | E80-1           | 1/7+8/2+12  |
| C853 | E81-12          | 1/7+8/2+12  |
| C854 | E85-2           | N/7+9/2+12  |
| C855 | F108-11         | 1/7+8/2+12  |
| C856 | F2-6            | N/7+9/2+12  |
| C857 | F79             | 1/7+8/2+12  |
| C858 | G102-2          | 1/7+8/2+12  |
| C859 | G16             | N/7+8/2+12  |
| C860 | G32-2           | 1/7+8/2+12  |
| C861 | G35-9           | 1/7+9/2+12  |
| C862 | G55-6           | 1/7+8/2+12  |
| C863 | G95-2           | 1/7+8/2+12  |
| C864 | G95-4           | 1/7+8/2+12  |
| C865 | Guan 136        | N/7+9/5+10  |
| C866 | Kang Bing R138  | 1/7+8/5+10  |
| C867 | Lan Hang 122    | N/7+8/2+12  |
| C868 | Lan Tian 01-368 | 1/7+9/2+12  |
| C869 | Lan Tian 722    | 1/7+8/2+12  |
| C870 | Lin You 8161    | 1/7+9/2+12  |
| C871 | Ling Xuan 6     | 1/7+8/2+12  |
| C872 | Long Jian 101   | 1/7+8/5+10  |
| C873 | Long Jian 107   | N/7+9/2+12  |
| C874 | Long Jian 108   | 1/7+8/2+12  |
| C875 | Long Jian 110   | 1/7+8/2+12  |
| C876 | Long Jian 111   | 1/7+8/5+10  |
| C877 | Long Jian 112   | 1/7+8/5+10  |
| C878 | Long Jian 113   | N/7+8/2+12  |
| C879 | Long Jian 114   | 1/7+8/2+12  |
| C880 | Long Jian 115   | 1/7+8/5+10  |
| C881 | Long Jian 116   | 1/7+8/5+10  |
| C882 | Long Jian 117   | 1/6+8/5+10  |
| C883 | Long Mai 079    | 1/7+9/2+12  |
| C884 | Long Mai 479    | 1/7+8/2+12  |
| C885 | Long Mai 491    | N/20X+20Y/N |
| C886 | Long Mai 844    | 1/7+9/2+12  |
| C887 | Long Mai 847    | 1/7+9/2+12  |
| C888 | Long Yu 0825    | 1/7+8/2+12  |
| C889 | Long Yu 4       | N/7+9/2+12  |
| C890 | Long Zhong 6    | 1/7+8/2+12  |
| C891 | Long Zi Mai 1   | 1/7+8/2+12  |
| C892 | Long Zi Mai 2   | 1/7+8/2+12  |
| C893 | Xi Ping 1       | 1/7+8/2+12  |
| C894 | 3249            | N/7+9/2+12  |
| C895 | Gao You 8901    | 1/7+9/5+10  |
| C896 | Ka Shan 14      | N/7+9/5+10  |
| C897 | Ka Shan 15      | 1/7+8/5+10  |
| C898 | Ka Shan 16      | 1/7+9/5+10  |



|      |                   |               |
|------|-------------------|---------------|
| C899 | Ka Shan 16210     | 2*/7+8/5+10   |
| C900 | Ka Shan 23        | 1/7+9/5+10    |
| C901 | Ka Shan 24        | N/7+9/2+12    |
| C902 | Ka Shan 25        | N/7+9/5+10    |
| C903 | Ka Shan 26        | N/7+9/2+12    |
| C904 | Ka Shan 27        | N/7+9/2+12    |
| C905 | Ka Shan 28        | 1/7+8/5+10    |
| C906 | Ka Shan 29        | 2*/7+8/5+10   |
| C907 | Ke Yi 12-6105     | 1/7+9/5+10    |
| C908 | Lan Kao Ai Te Zao | 1/13+16/2+12  |
| C909 | Ning Mai 12       | N/7+9/2+12    |
| C910 | Pu Bing 151       | 1/7+9/2+12    |
| C911 | Pu Bing 322       | 1/7+8/2+12    |
| C912 | Pu Bing 9946      | 1/7+8/5+10    |
| C913 | Tai Shan 9819     | N/7+8/5+10    |
| C914 | Wu 44             | 1/7+8/5+10    |
| C915 | Wu 51             | 1/7+9/5+10    |
| C916 | Jing Hong 10      | 2*/17+18/5+10 |
| C917 | Xin Chun 7-1      | N/7+8/5+10    |
| C918 | Xin Chun 7-2      | 2*/7+8/5+10   |
| C919 | Gan Chun 18       | N/7+8/2+12    |
| C920 | Gan Chun 11       | 1/7+8/2+12    |
| C921 | Shi Dong 3        | N/6+8/2+12    |
| C922 | Zhong Zhi 1       | 1/7+8/5+10    |
| C923 | Zhong Zhi 3       | 1/7+8/2+12    |
| C924 | Zhong Zhi 5       | 1/7+9/2+12    |
| C925 | Zhong Zhi 6       | N/7+9/2+12    |
| C926 | Long Fu 2         | N/6+8/5+10    |

HWWR: Huang-huai winter wheat region,

MLYWWR: Middle and Low Yangtze Winter Wheat Region,

SWWR: Southwest Winter Wheat Region,

NSWR: Northwest Spring Wheat Region.
